# Supplementary material
Source: publisher figshare collection journal article supplement (https://acs.figshare.com/ndownloader/files/4640725)

## Supporting Information

### Rhodium-Catalyzed Borylative Cyclization of 2-Alkynylaryl Isocyanates with Bis(pinacolato)diboron

Tomoya Miura, Yusuke Takahashi, and Masahiro Murakami\*

Department of Synthetic Chemistry and Biological Chemistry, Kyoto University  
Katsura, Kyoto 615-8510 (Japan)

**General.** All reactions were carried out with standard Schlenk techniques under an argon atmosphere.  $^1\text{H}$  and  $^{13}\text{C}$  NMR spectra were recorded on a Varian Gemini 2000 ( $^1\text{H}$  at 300.07 MHz and  $^{13}\text{C}$  at 75.46 MHz) spectrometer. All NMR data were obtained in  $\text{CDCl}_3$ . Proton chemical shifts were referenced to the residual proton signal of the solvent at 7.26 ppm. Carbon chemical shifts were referenced to the carbon signal of the solvent at 77.0 ppm. High-resolution mass spectra were recorded on a JEOL JMS-SX102A spectrometer. Infrared spectra were recorded on a Shimadzu FTIR-8100 spectrometer. Column chromatography was performed with Florisil<sup>®</sup> (60-100 mesh) (Wako). Preparative thin-layer chromatography was performed with silica 60  $\text{PF}_{254}$  (Merck).

**Materials.** Anhydrous 1,2-dichloroethane was freshly distilled from calcium hydride. Bis(pinacolato)diboron (**2**) was purchased from Wako Pure Chemical Industries, Ltd and used as received. All other commercially available resources were used without further purification.  $[\text{Rh}(\text{OH})(\text{cod})]_2$ <sup>1</sup> and  $[\text{Rh}(\text{cod})_2]\text{SbF}_6$ <sup>2</sup> were prepared according to the reported procedure. 2-(Alkynyl)anilines were prepared by Sonogashira reaction<sup>3</sup> of the corresponding 2-iodoaniline derivatives<sup>4</sup> with alkyne. 2-(Alkynyl)aryl isocyanates were synthesized from the corresponding 2-(alkynyl)aniline according to the reported procedure.<sup>5</sup> The analytical data of compounds **1a**, **1b**, **1c**, **1d**, **1e**, **1f**, **1j**, **1k**, **1l**, and **5** have been already reported.<sup>6</sup>

**1g:** IR (KBr): 2267, 1607, 1514, 1250, 1030  $\text{cm}^{-1}$ ;  $^1\text{H}$  NMR:  $\delta$  = 3.83 (s, 3H), 6.87–6.94 (m, 2H), 7.06 (dd,  $J$  = 8.4, 1.5 Hz, 1H), 7.16 (td,  $J$  = 7.8, 1.5 Hz, 1H), 7.25 (td,  $J$  = 7.5, 1.8 Hz, 1H), 7.51 (dd,  $J$  = 7.5, 1.8 Hz, 1H), 7.54–7.61 (m, 2H);  $^{13}\text{C}$  NMR:  $\delta$  = 55.1, 83.6, 97.6, 113.9, 114.3, 121.2, 123.3, 125.2, 127.2, 128.7, 131.8, 132.8, 134.3, 159.9; HRMS ( $\text{EI}^+$ ): Calcd for  $\text{C}_{16}\text{H}_{11}\text{NO}_2$ ,  $M^+$  249.0790. Found  $m/z$  249.0789.

**1h:** IR (KBr): 2251, 1595, 1509, 1487, 1071  $\text{cm}^{-1}$ ;  $^1\text{H}$  NMR:  $\delta$  = 7.07 (dd,  $J$  = 7.8, 1.2 Hz, 1H), 7.18 (td,  $J$  = 7.5, 1.2 Hz, 1H), 7.29 (td,  $J$  = 7.5, 1.5 Hz, 1H), 7.44–7.54 (m, 5H);  $^{13}\text{C}$  NMR:  $\delta$  = 85.8, 96.3, 120.6, 121.3, 123.2, 123.6, 125.5, 127.1, 129.5, 131.6, 132.2, 132.8, 134.7; HRMS ( $\text{EI}^+$ ): Calcd for  $\text{C}_{15}\text{H}_8\text{BrNO}$ ,  $M^+$  296.9789. Found  $m/z$  296.9785.

**1i:** IR (KBr): 2276, 1595, 1503, 1418, 1080  $\text{cm}^{-1}$ ;  $^1\text{H}$  NMR:  $\delta$  = 7.06 (dd,  $J$  = 8.1, 1.2 Hz, 1H), 7.17 (td,  $J$  = 7.7, 0.9 Hz, 1H), 7.22–7.36 (m, 3H), 7.50 (dd,  $J$  = 7.5, 1.8 Hz, 1H), 7.66 (dd,  $J$  = 3.0, 1.2 Hz, 1H);  $^{13}\text{C}$  NMR:  $\delta$  = 84.4, 92.9, 120.7, 121.2, 123.3, 125.2, 125.3, 127.2, 128.9, 129.3, 129.4, 131.7, 134.5; HRMS ( $\text{EI}^+$ ): Calcd for  $\text{C}_{13}\text{H}_7\text{NOS}$ ,  $M^+$  225.0248. Found  $m/z$  225.0247.

<sup>1</sup> Uson, R.; Oro, L. A.; Cabeza, J. A. *Inorg. Synth.* **1985**, 23, 126.

<sup>2</sup> RajanBabu, T. V.; Ayers, T. A.; Halliday, G. A.; You, K. K.; Calabrese, J. C. *J. Org. Chem.* **1997**, 62, 6012.

<sup>3</sup> Kamijo, S.; Yamamoto, Y. *Angew. Chem. Int. Ed.* **2002**, 41, 3230.

<sup>4</sup> Trost, B. M.; McClory, A. *Angew. Chem. Int. Ed.* **2007**, 46, 2074.

<sup>5</sup> Li, H.; Yang, H.; Petersen, J. L.; Wang, K. K. *J. Org. Chem.* **2004**, 69, 4500.

<sup>6</sup> Miura, T.; Takahashi, Y.; Murakami, M. *Org. Lett.* **2007**, 9, 5075.

**Typical procedure for the rhodium-catalyzed borylative cyclization with B<sub>2</sub>pin<sub>2</sub>:** To an oven-dried, Ar-purged flask was added [Rh(cod)<sub>2</sub>]SbF<sub>6</sub> (3.6 mg, 6.5 μmol), **2** (49.2 mg, 0.193 mmol), and a solution of **1a** (25.8 mg, 0.129 mmol) in DCE (1.5 mL). The reaction mixture was stirred at 80 °C for 6 h, and then quenched with NaOH aq. (0.1 M, 5 mL). The aqueous layer was extracted with diethyl ether (4 x 15 mL). The combined extracts were washed with NaOH aq. (0.1 M, 2 x 10 mL), H<sub>2</sub>O (3 x 10 mL), and brine (1 x 10 mL) and dried over MgSO<sub>4</sub>. The solvent was removed under reduced pressure and the residue was quickly purified by Florisil<sup>®</sup> column chromatography (dichloromethane to diethyl ether) to give **3a** (30.1 mg, 0.092 mmol, 71%) as a yellow solid: Recrystallization from hexane; IR (KBr): 3204, 1698, 1615, 1466, 1347, 1221 cm<sup>-1</sup>; <sup>1</sup>H NMR: δ = 0.97 (t, *J* = 7.4 Hz, 3H), 1.39–1.56 (m, 2H), 1.43 (s, 12H), 1.59–1.72 (m, 2H), 2.69–2.79 (m, 2H), 6.81 (d, *J* = 7.8 Hz, 1H), 6.99 (t, *J* = 7.4 Hz, 1H), 7.17 (td, *J* = 7.7, 0.6 Hz, 1H), 7.54 (d, *J* = 7.8 Hz, 1H), 9.10 (br s, 1H); <sup>13</sup>C NMR: δ = 13.9, 23.1, 24.9, 29.9, 31.8, 83.9, 110.0, 121.7, 122.7, 123.7, 128.4, 132.4, 142.2, 151.9 (br), 170.9; HRMS (CI<sup>+</sup>): Calcd for C<sub>19</sub>H<sub>26</sub>BNO<sub>3</sub>, M<sup>+</sup> 327.2006. Found m/z 327.2006.

**3b:** Recrystallization from hexane; IR (KBr): 3179, 1698, 1615, 1464, 1348, 1221 cm<sup>-1</sup>; <sup>1</sup>H NMR: δ = 1.28 (t, *J* = 7.7 Hz, 3H), 1.43 (s, 12H), 2.78 (q, *J* = 7.6 Hz, 2H), 6.81 (d, *J* = 7.5 Hz, 1H), 6.99 (td, *J* = 7.7, 1.2 Hz, 1H), 7.17 (td, *J* = 7.8, 1.2 Hz, 1H), 7.54 (d, *J* = 7.8 Hz, 1H), 8.86 (br s, 1H); <sup>13</sup>C NMR: δ = 12.1, 25.0, 25.3, 84.0, 109.9, 121.9, 122.8, 123.9, 128.5, 132.0, 142.0, 152.8 (br), 170.6; HRMS (EI<sup>+</sup>): Calcd for C<sub>17</sub>H<sub>22</sub>BNO<sub>3</sub>, M<sup>+</sup> 299.1693. Found m/z 299.1691.

**3c:** Recrystallization from hexane; IR (KBr): 3187, 1698, 1613, 1464, 1344, 1223 cm<sup>-1</sup>; <sup>1</sup>H NMR: δ = 1.07 (t, *J* = 7.2 Hz, 3H), 1.43 (s, 12H), 1.63–1.79 (m, 2H), 2.68–2.76 (m, 2H), 6.81 (d, *J* = 8.1 Hz, 1H), 6.98 (td, *J* = 7.7, 1.2 Hz, 1H), 7.17 (td, *J* = 7.8, 1.2 Hz, 1H), 7.54 (d, *J* = 7.8 Hz, 1H), 9.21 (br s, 1H); <sup>13</sup>C NMR: δ = 14.7, 21.3, 25.0, 34.3, 84.0, 109.9, 121.9, 122.9, 123.9, 128.5, 132.4, 142.0, 170.6 (The boron-bound carbon was not detected due to the quadrupolar relaxation); HRMS (EI<sup>+</sup>): Calcd for C<sub>18</sub>H<sub>24</sub>BNO<sub>3</sub>, M<sup>+</sup> 313.1849. Found m/z 313.1852.

**3d:** Recrystallization from hexane; IR (KBr): 3179, 1698, 1615, 1464, 1354, 1223 cm<sup>-1</sup>; <sup>1</sup>H NMR: δ = 1.28 (d, *J* = 7.2 Hz, 6H), 1.45 (s, 12H), 3.52 (septet, *J* = 6.9 Hz, 1H), 6.81 (d, *J* = 7.8 Hz, 1H), 6.98 (td, *J* = 7.7, 1.2 Hz, 1H), 7.16 (td, *J* = 7.8, 1.2 Hz, 1H), 7.57 (d, *J* = 7.5 Hz, 1H), 9.03 (br s, 1H); <sup>13</sup>C NMR: δ = 21.4, 25.5, 31.0, 84.1, 109.9, 121.8, 122.6, 124.2, 128.5, 131.1, 142.0, 158.2 (br), 170.9; HRMS (EI<sup>+</sup>): Calcd for C<sub>18</sub>H<sub>24</sub>BNO<sub>3</sub>, M<sup>+</sup> 313.1849. Found m/z 313.1847.

**3e:** Recrystallization from hexane; IR (KBr): 3216, 1700, 1593, 1464, 1312, 1142 cm<sup>-1</sup>; <sup>1</sup>H NMR: δ = 1.39 (s, 6H), 1.46 (s, 9H), 1.50 (s, 6H), 6.84 (dd, *J* = 7.5, 0.6 Hz, 1H), 7.01 (td, *J* = 7.7, 1.1 Hz, 1H), 7.16 (td, *J* = 7.7, 1.2 Hz, 1H), 7.72 (d, *J* = 7.8 Hz, 1H), 8.74 (br s, 1H); <sup>13</sup>C NMR: δ = 25.7, 26.5, 28.9, 35.4, 83.7, 110.1, 121.2, 121.6, 127.8, 128.4, 132.0, 142.6, 164.9 (br), 171.7; HRMS (EI<sup>+</sup>): Calcd for C<sub>19</sub>H<sub>26</sub>BNO<sub>3</sub>, M<sup>+</sup> 327.2006. Found m/z 327.2006.

**3f:** Recrystallization from toluene; IR (KBr): 3204, 1709, 1613, 1466, 1343, 1215 cm<sup>-1</sup>; <sup>1</sup>H NMR: δ = 1.38 (s, 12H), 6.72 (t, *J* = 7.7 Hz, 1H), 6.80 (d, *J* = 7.8 Hz, 1H), 7.01 (d, *J* = 7.5 Hz, 1H), 7.12 (t, *J* = 7.7 Hz, 1H), 7.34–7.54 (m, 5H), 9.05 (br s, 1H); <sup>13</sup>C NMR: δ = 24.8, 84.3, 110.0, 121.7, 121.9, 123.4, 127.3, 128.3, 128.7, 129.4, 132.7, 137.7, 142.4, 147.9 (br), 170.8; HRMS (EI<sup>+</sup>): Calcd for C<sub>21</sub>H<sub>22</sub>BNO<sub>3</sub>, M<sup>+</sup> 347.1693. Found m/z 347.1692.

**3g:** Recrystallization from toluene; IR (KBr): 3169, 1690, 1577, 1464, 1345, 1250 cm<sup>-1</sup>; <sup>1</sup>H NMR: δ = 1.39 (s, 12H), 3.87 (s, 3H), 6.75 (td, *J* = 7.8, 0.9 Hz, 1H), 6.80 (d, *J* = 7.5 Hz, 1H), 6.94–7.01 (m, 2H), 7.13 (td, *J* = 7.5, 1.2 Hz, 1H), 7.21 (d, *J* = 7.5 Hz, 1H), 7.44–7.52 (m, 2H), 8.76 (br s, 1H); <sup>13</sup>C NMR: δ = 24.9, 55.3, 84.2, 110.0, 114.0, 121.5, 122.0, 123.0, 129.1, 129.2, 129.8, 131.8, 142.4, 147.9 (br), 159.8, 171.2; HRMS (EI<sup>+</sup>): Calcd for C<sub>22</sub>H<sub>24</sub>BNO<sub>4</sub>, M<sup>+</sup> 377.1798. Found m/z 377.1799.

**3h:** Recrystallization from toluene; IR (KBr): 3179, 1694, 1607, 1464, 1343, 1142  $\text{cm}^{-1}$ ;  $^1\text{H}$  NMR:  $\delta$  = 1.37 (s, 12H), 6.76 (td,  $J$  = 7.8, 0.9 Hz, 1H), 6.80 (d,  $J$  = 7.8 Hz, 1H), 7.01 (d,  $J$  = 7.5 Hz, 1H), 7.15 (td,  $J$  = 7.8, 1.2 Hz, 1H), 7.34–7.41 (m, 2H), 7.55–7.61 (m, 2H), 8.58 (br s, 1H);  $^{13}\text{C}$  NMR:  $\delta$  = 24.8, 84.4, 110.2, 121.6, 121.8, 122.5, 123.4, 129.1, 129.8, 131.9, 133.0, 136.6, 142.5, 146.2 (br), 170.7; HRMS ( $\text{EI}^+$ ): Calcd for  $\text{C}_{21}\text{H}_{21}\text{BBrNO}_3$ ,  $M^+$  425.0798. Found  $m/z$  425.0798.

**3i:** Recrystallization from toluene; IR (KBr): 3187, 1698, 1605, 1464, 1323, 1140  $\text{cm}^{-1}$ ;  $^1\text{H}$  NMR:  $\delta$  = 1.41 (s, 12H), 6.77–6.85 (m, 2H), 7.15 (td,  $J$  = 7.8, 0.9 Hz, 1H), 7.28 (dd,  $J$  = 5.4, 1.4 Hz, 1H), 7.37 (d,  $J$  = 8.1 Hz, 1H), 7.43 (dd,  $J$  = 4.8, 3.0 Hz, 1H), 7.51 (dd,  $J$  = 3.0, 1.2 Hz, 1H), 9.12 (br s, 1H);  $^{13}\text{C}$  NMR:  $\delta$  = 24.9, 84.2, 110.1, 121.7, 121.9, 123.2, 124.5, 126.1, 127.5, 129.4, 132.4, 137.7, 142.0 (br), 142.4, 171.2; HRMS ( $\text{EI}^+$ ): Calcd for  $\text{C}_{19}\text{H}_{20}\text{BNO}_3\text{S}$ ,  $M^+$  353.1257. Found  $m/z$  353.1262.

**3j:** Recrystallization from hexane/dichloromethane; IR (KBr): 3173, 1703, 1617, 1474, 1345, 1129  $\text{cm}^{-1}$ ;  $^1\text{H}$  NMR:  $\delta$  = 0.98 (t,  $J$  = 7.4 Hz, 3H), 1.42 (s, 12H), 1.42–1.56 (m, 2H), 1.59–1.72 (m, 2H), 2.67–2.75 (m, 2H), 6.73 (d,  $J$  = 8.1 Hz, 1H), 7.15 (dd,  $J$  = 8.1, 2.1 Hz, 1H), 7.49 (d,  $J$  = 1.8 Hz, 1H), 9.19 (br s, 1H);  $^{13}\text{C}$  NMR:  $\delta$  = 14.0, 23.1, 25.0, 29.9, 32.0, 84.2, 110.8, 124.0, 124.1, 127.1, 128.3, 131.5, 140.4, 154.4 (br), 170.5; HRMS ( $\text{EI}^+$ ): Calcd for  $\text{C}_{19}\text{H}_{25}\text{BClNO}_3$ ,  $M^+$  361.1616. Found  $m/z$  361.1623.

**3k:** Recrystallization from hexane/dichloromethane; IR (KBr): 3179, 1700, 1628, 1480, 1345, 1206  $\text{cm}^{-1}$ ;  $^1\text{H}$  NMR:  $\delta$  = 0.97 (t,  $J$  = 7.4 Hz, 3H), 1.41 (s, 12H), 1.41–1.56 (m, 2H), 1.59–1.71 (m, 2H), 2.67–2.75 (m, 2H), 3.79 (s, 3H), 6.68–6.77 (m, 2H), 7.13–7.17 (m, 1H), 8.02 (br s, 1H);  $^{13}\text{C}$  NMR:  $\delta$  = 14.0, 23.2, 25.0, 29.9, 31.8, 55.8, 83.9, 109.9, 111.4, 112.8, 123.7, 132.6, 136.0, 152.4 (br), 155.0, 170.8; HRMS ( $\text{EI}^+$ ): Calcd for  $\text{C}_{20}\text{H}_{28}\text{BNO}_4$ ,  $M^+$  357.2111. Found  $m/z$  357.2108.

**3l:** Recrystallization from hexane/dichloromethane; IR (KBr): 3158, 1701, 1615, 1478, 1341, 1254  $\text{cm}^{-1}$ ;  $^1\text{H}$  NMR:  $\delta$  = 1.00 (t,  $J$  = 7.4 Hz, 3H), 1.39 (t,  $J$  = 7.1 Hz, 3H), 1.43 (s, 12H), 1.46–1.59 (m, 2H), 1.61–1.74 (m, 2H), 2.74–2.85 (m, 2H), 4.36 (q,  $J$  = 7.2 Hz, 2H), 6.85 (d,  $J$  = 8.1 Hz, 1H), 7.95 (dd,  $J$  = 8.4, 1.5 Hz, 1H), 8.24 (s, 1H), 9.30 (br s, 1H);  $^{13}\text{C}$  NMR:  $\delta$  = 13.9, 14.4, 23.1, 25.0, 29.8, 32.0, 60.9, 84.2, 109.4, 122.6, 124.3, 125.2, 130.9, 131.3, 145.7, 154.3 (br), 166.3, 171.0; HRMS ( $\text{EI}^+$ ): Calcd for  $\text{C}_{22}\text{H}_{30}\text{BNO}_5$ ,  $M^+$  399.2217. Found  $m/z$  399.2212.

**The Suzuki-Miyaura cross-coupling reaction with iodobenzene:** To an oven-dried,  $\text{N}_2$ -purged flask was added **3a** (18.0 mg, 0.0550 mmol),  $\text{K}_2\text{CO}_3$  (22.8 mg, 0.165 mmol), **4** (33.7 mg, 0.165 mmol),  $\text{H}_2\text{O}$  (0.1 mL), and a solution of  $\text{Pd}[\text{P}(t\text{-Bu})_3]_2$  (1.4 mg, 2.7  $\mu\text{mol}$ ) in 1,4-dioxane (1.0 mL). The reaction mixture was stirred at 100  $^\circ\text{C}$  for 2 h, and then quenched with  $\text{H}_2\text{O}$  (2 mL). The aqueous layer was extracted with ethyl acetate (4 x 15 mL). The combined extracts were washed with brine and dried over  $\text{MgSO}_4$ . The solvent was removed under reduced pressure and the residue was purified by preparative thin-layer chromatography (chloroform/ethyl acetate = 10:1) to give **5** (13.0 mg, 0.0469 mmol, 85%) as a yellow solid.

**The bromination reaction with copper(II) bromide:** To an oven-dried,  $\text{N}_2$ -purged flask was added **3a** (16.1 mg, 0.0492 mmol), EtOH (1.0 mL), and a solution of  $\text{CuBr}_2$  (**6**, 55.0 mg, 0.246 mmol) in  $\text{H}_2\text{O}$  (1.0 mL). The reaction mixture was stirred at 80  $^\circ\text{C}$  for 12 h, and then quenched with  $\text{H}_2\text{O}$  (2 mL). The aqueous layer was extracted with ethyl acetate (4 x 15 mL). The combined extracts were washed with brine and dried over  $\text{MgSO}_4$ . The solvent was removed under reduced pressure and the residue was purified by preparative thin-layer chromatography (chloroform/ethyl acetate = 10:1) to give **7** (13.2 mg, 0.0471 mmol, 96%,  $E/Z$  = 1:20) as a yellow solid: IR (KBr): 3335, 2959, 1709, 1684, 1605, 1470, 1192  $\text{cm}^{-1}$ ;  $^1\text{H}$  NMR:  $\delta$  = 0.99 (t,  $J$  = 7.2 Hz, 3H), 1.44–1.60 (m, 2H), 1.70–1.85 (m, 2H), 3.14–3.23 (m, 2H), 6.89–6.95 (m, 1H), 7.01 (td,  $J$  = 7.8, 1.1 Hz, 1H), 7.25 (td,  $J$  = 7.8, 1.1 Hz, 1H), 7.45 (d,  $J$  = 7.8 Hz, 1H), 8.76 (br s, 1H);  $^{13}\text{C}$  NMR:  $\delta$  = 14.0, 22.4, 29.7, 42.3, 109.9, 122.0, 122.4, 123.3, 125.2, 129.1, 138.8, 141.1, 167.2; HRMS ( $\text{EI}^+$ ): Calcd for  $\text{C}_{13}\text{H}_{14}\text{BrNO}$ ,  $M^+$  279.0259. Found  $m/z$  279.0251.

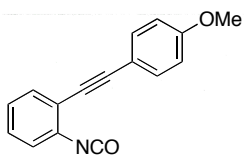

1g

STANDARD 1H OBSERVE

Pulse Sequence: s2pul

Solvent: CDCl3

Ambient Temperature

GBMIM-300BB "varian2"

Relax. delay 1.502 sec

Pulse 45.0 degrees

Acq. time 3.200 sec

Width 5000.0 Hz

16 Repetitions

OBSERVE HL 300.0672328 MHz

DATA PROCESSING

FT size 32768

Total time 1 min, 24 sec

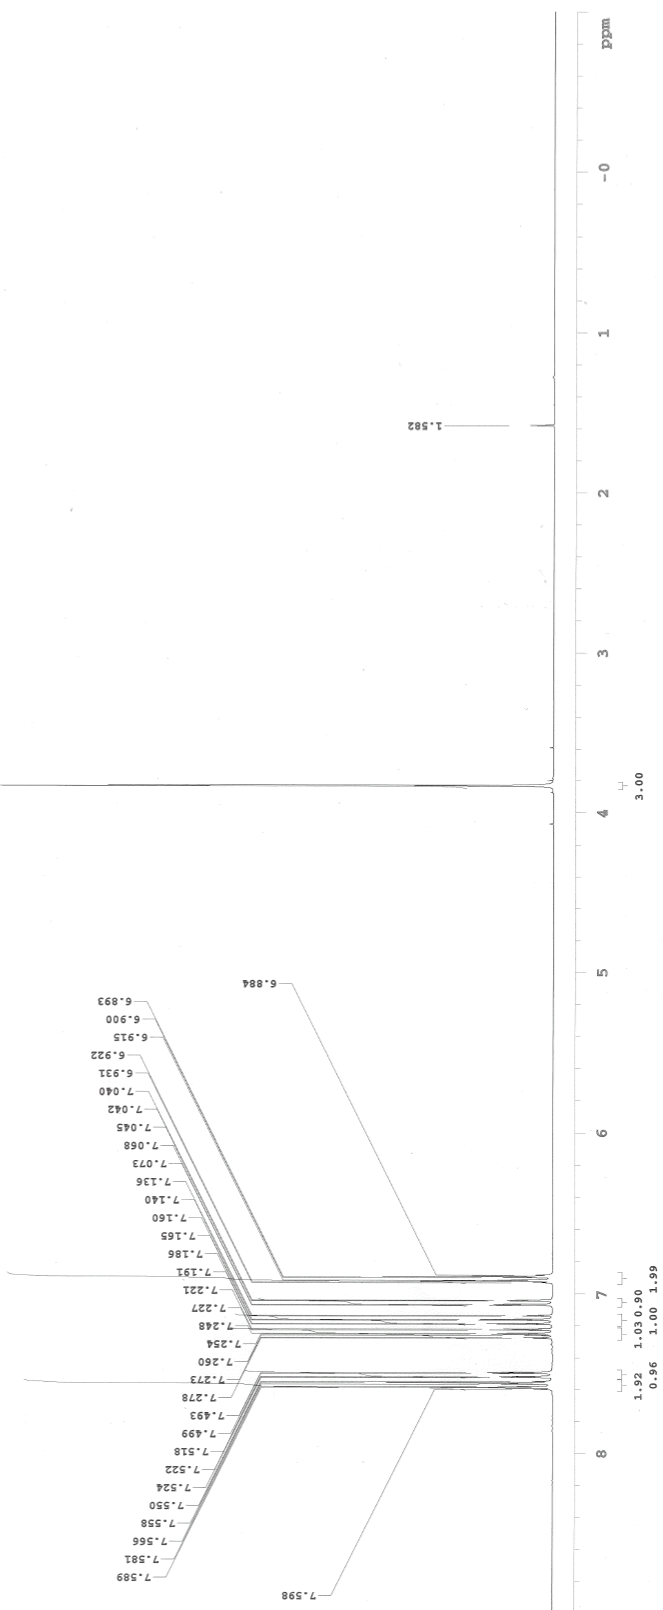

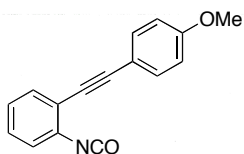

1g

13C OBSERVE

Pulse Sequence: s2pul  
 Solvent: CDCl3  
 Ambient temperature  
 GEMINI-300BB "variant2"  
 Relax. delay 1.158 sec  
 Pulse 45.0 degrees  
 Acq. time 0.842 sec  
 Width 24000.0 Hz  
 44 Repetitions  
 OBSERVE C13, 75.4519827 MHz  
 DECOUPLE H1, 300.0697335 MHz  
 Power 37 dB  
 continuously on  
 WALTZ-16 modulated  
 DATA PROCESSING  
 FINE DECODING 1.0 Hz  
 F2 size 6528  
 F2 time 44 min, 44 sec  
 Total time 44 min, 44 sec

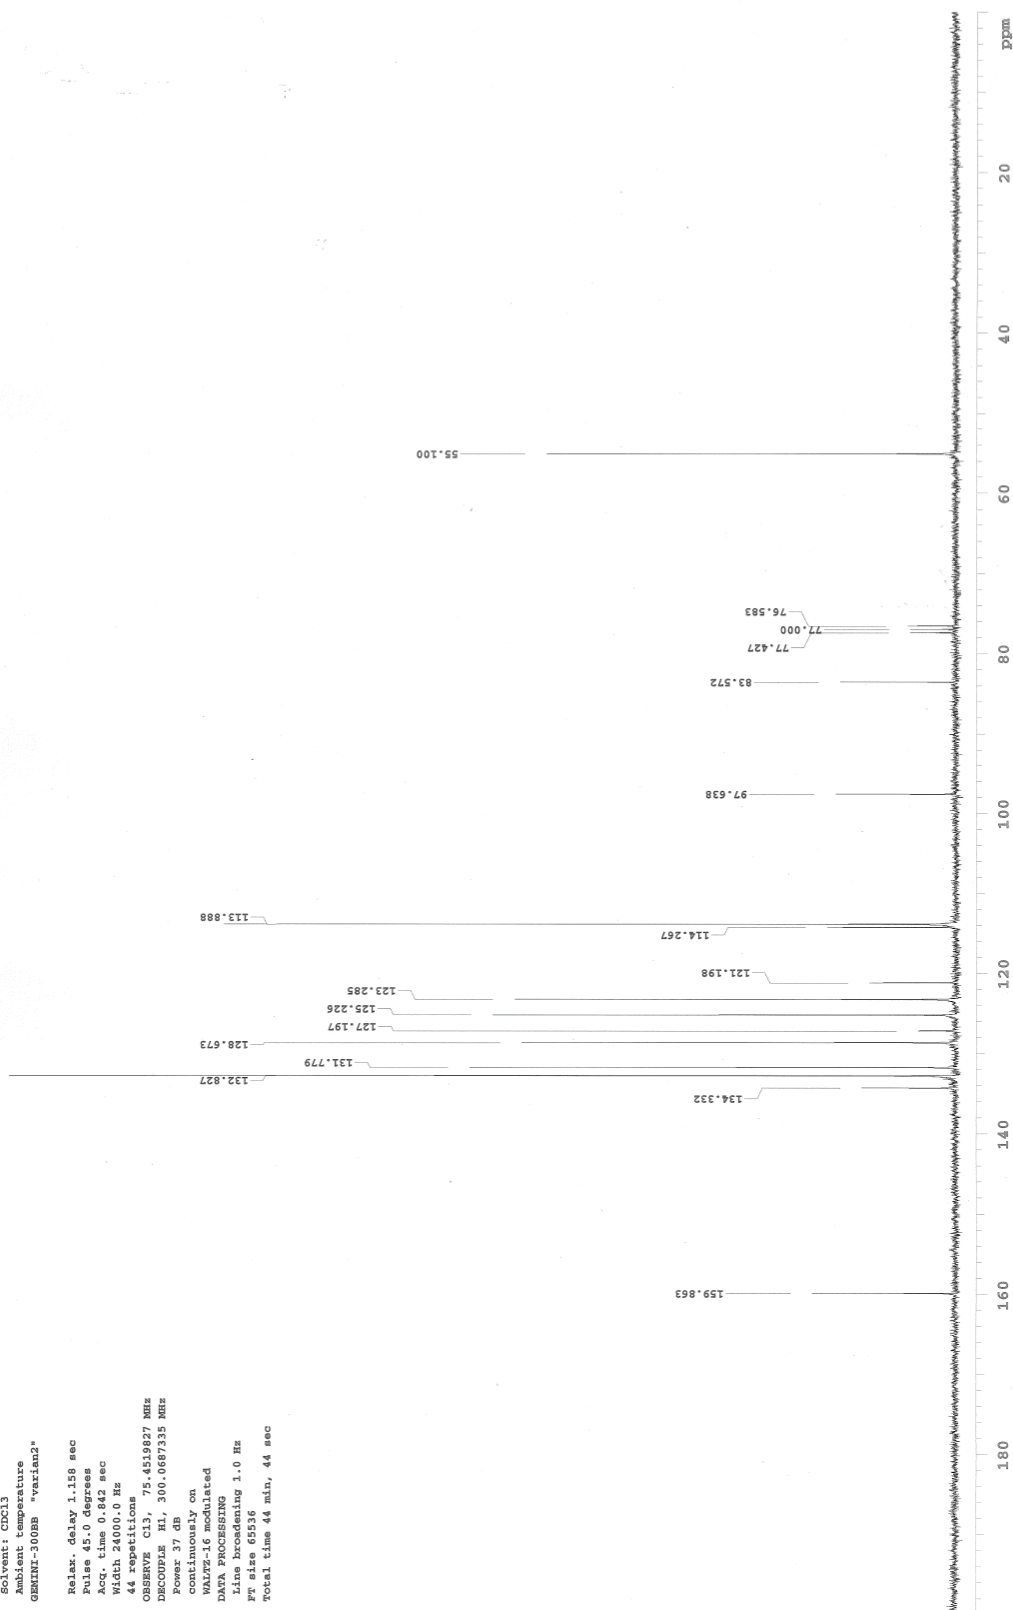

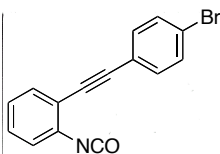

1h

STANDARD 1H OBSERVE

Pulse sequence: s2pul

Solvent: CDCl3

Ambient temperature

QNP1H-300MHz "varian2"

Relax. delay 1.502 sec

Pulse 45.0 degrees

Acq. time 3.200 sec

Width 5000 Hz

487.483

16 repetitions

OBSERVE H1, 300.10672328 MHz

DATA PROCESSING

FT size 32768

Total time 1 min, 24 sec

7.530  
7.526  
7.521  
7.505

7.208  
7.204  
7.183  
7.179  
7.157  
7.153  
7.085  
7.081  
7.059  
7.056

7.260  
7.270  
7.291  
7.296  
7.316  
7.321  
7.453  
7.455  
7.460  
7.475  
7.483

1.544

ppm

-0

1

2

3

4

5

6

7

8

5.26 1.12

1.08 1.00

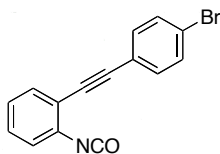

1h

13C OBSERVE

Pulse Sequence: zgpg30

Solvent: CDCl3

Ambient temperature

QNP-1300B8 "vian2"

Relax. delay 1.158 sec

Pulse 45.0 degrees

Acq. time 0.842 sec

Width 24000.0 Hz

12200 repetitions

OBSERVE C13, 75.4519696 MHz

DECOUPLE H1, 300.0687335 MHz

Power 37 dB

NUC13C13

NUC13C13

DATA PROCESSING

Line broadening 1.0 Hz

FT size 65536

Total time 745 hr, 37 min, 52 sec

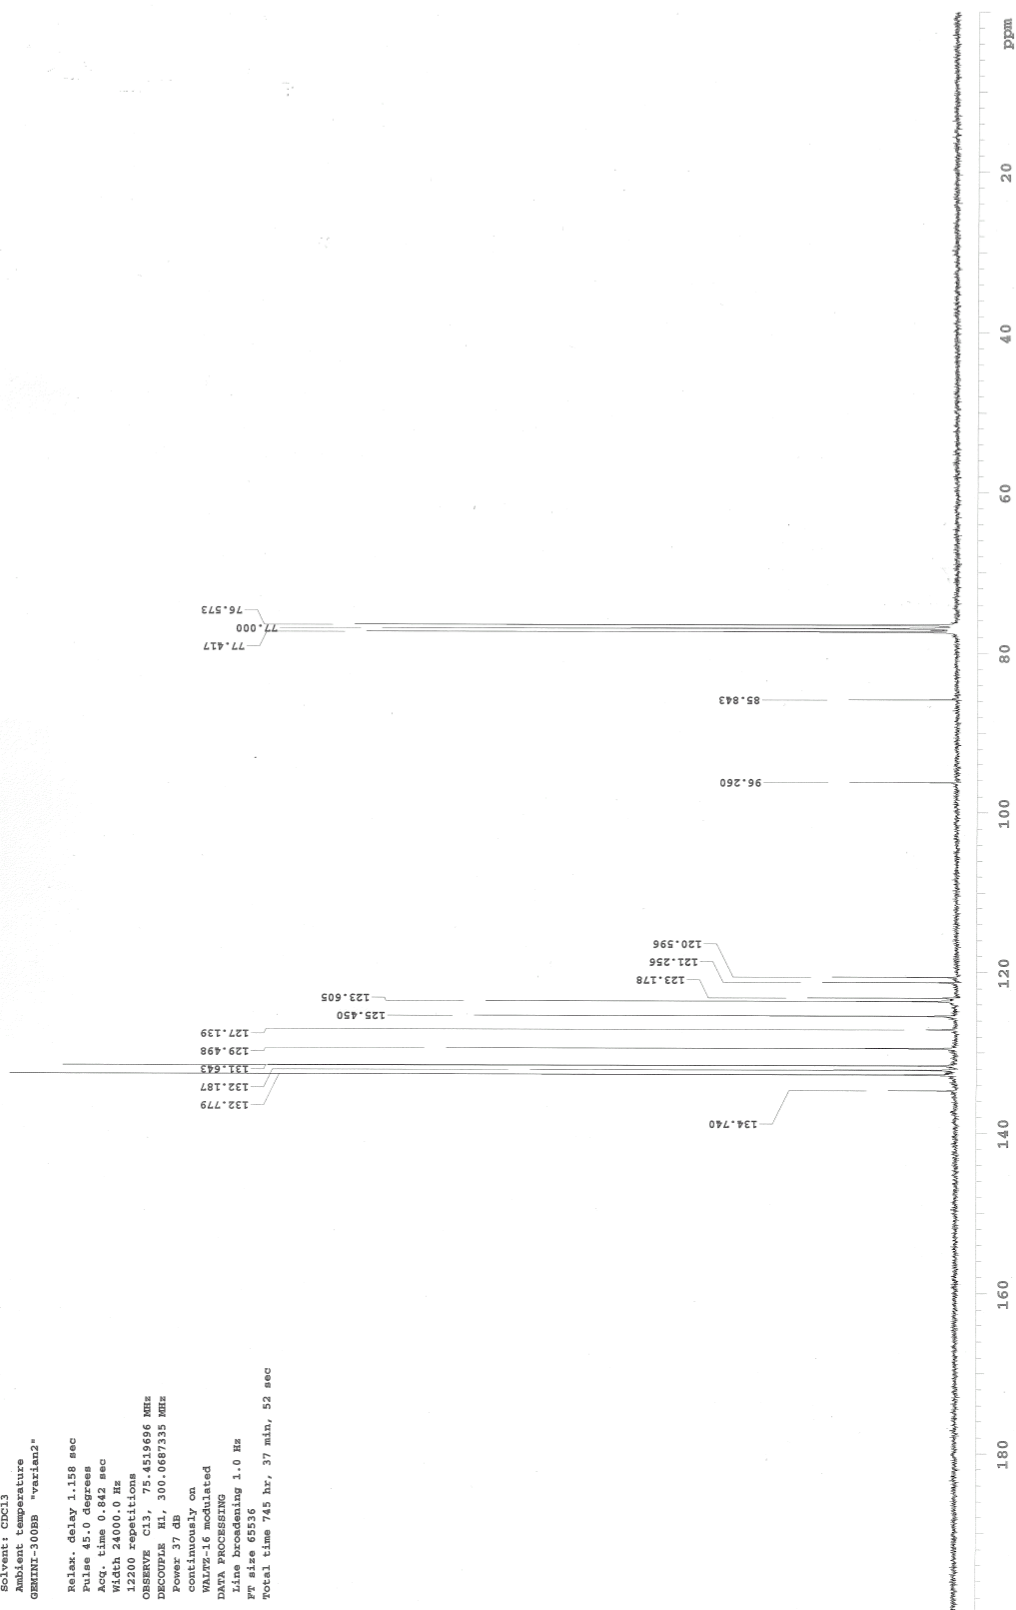

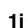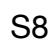



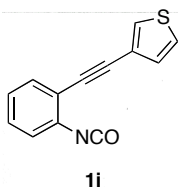

13C OBSERVE

Pulse Sequence: s2pul  
 Solvent: CDCl3  
 Ambient temperature  
 GEMINI-300DB "varian2"  
 Relax. delay 1.158 sec  
 Pulse 45.0 degrees  
 Acq. time 0.842 sec  
 Width 24000.0 Hz  
 48 repetitions  
 OBSERVE C13, 75.4519866 MHz  
 DECOUPLE H1, 300.0687335 MHz  
 Power 37 dB  
 continuously on  
 WALTZ-16 modulated  
 DATA PROCESSING  
 Line broadening 1.0 Hz  
 FT size 65536  
 Total time 22 min, 22 sec

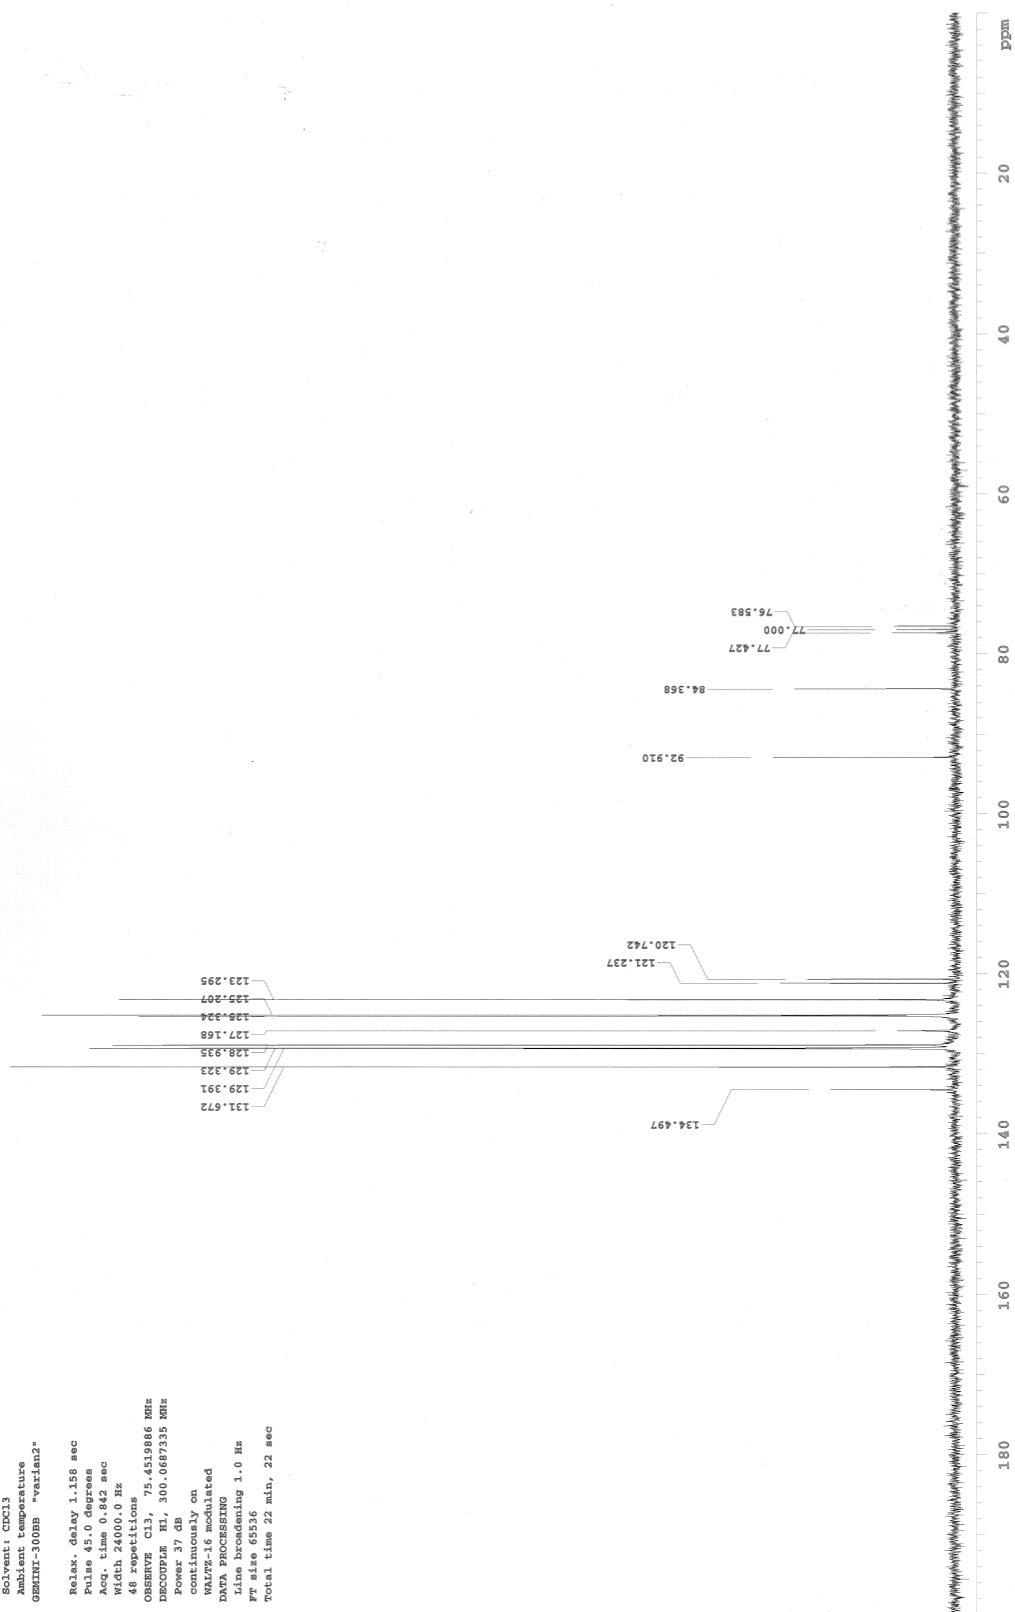

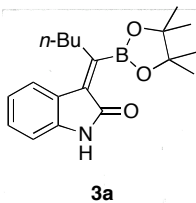

STANDARD IN OBSERVE

Pulse Sequence: s2pul  
 Solvent: CDCl3  
 Ambient temperature  
 GEMINI-300DB "variant2"  
 Relax. delay 1.502 sec  
 Pulse 45.0 degrees  
 Acq. time 3.200 sec  
 Width 5000.0 Hz  
 16 repetitions  
 OBSERVE M1, 300.0672331 MHz  
 DATA PROCESSING  
 F1 size 32768  
 Total time 1 min, 24 sec

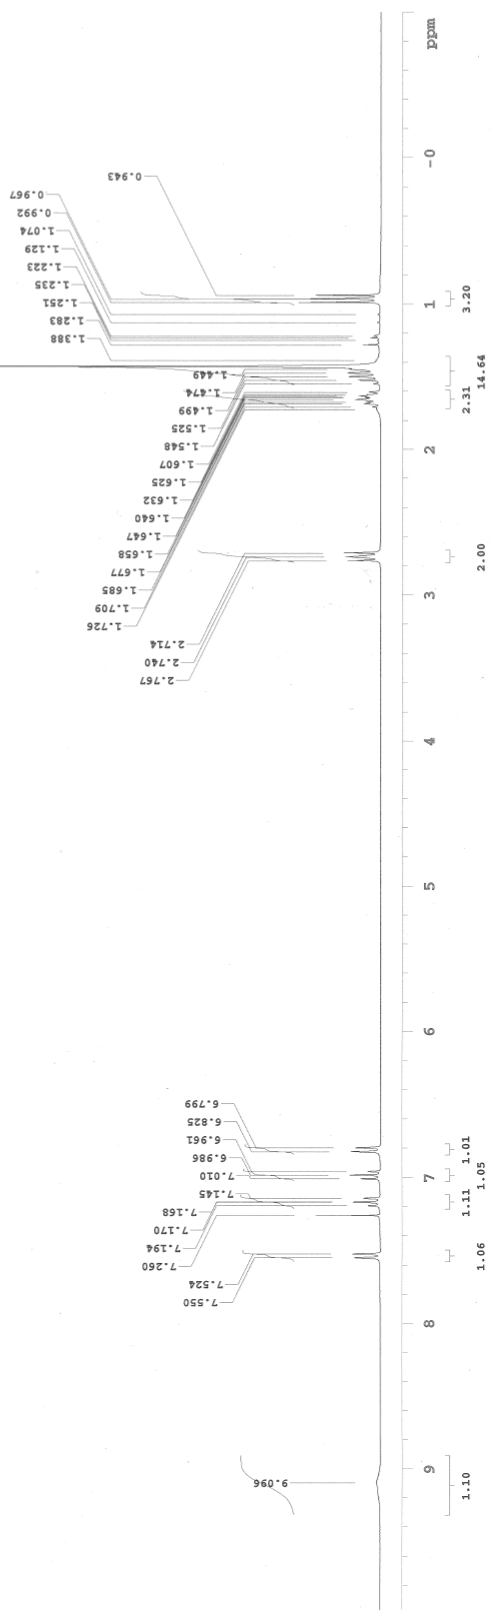

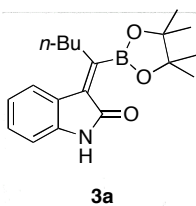

13C OBSERVE

Pulse sequence: s2pul

Solvent: CDCl3

Ambient temperature

QNP1H-300BB "variant2"

Relax. delay 1.158 sec

Pulse 45.0 degrees

Acq. time 0.842 sec

Width 24000.0 Hz

84 Repetitions

OBSERVE C13, 75.4519769 MHz

DECOUPLE H1, 300.0687335 MHz

Power 37 dB

continuously on

WALTZ-16 modulated

DATA PROCESSING

Acquisition 1.0 Hz

FT size 65536

Total time 44 min, 44 sec

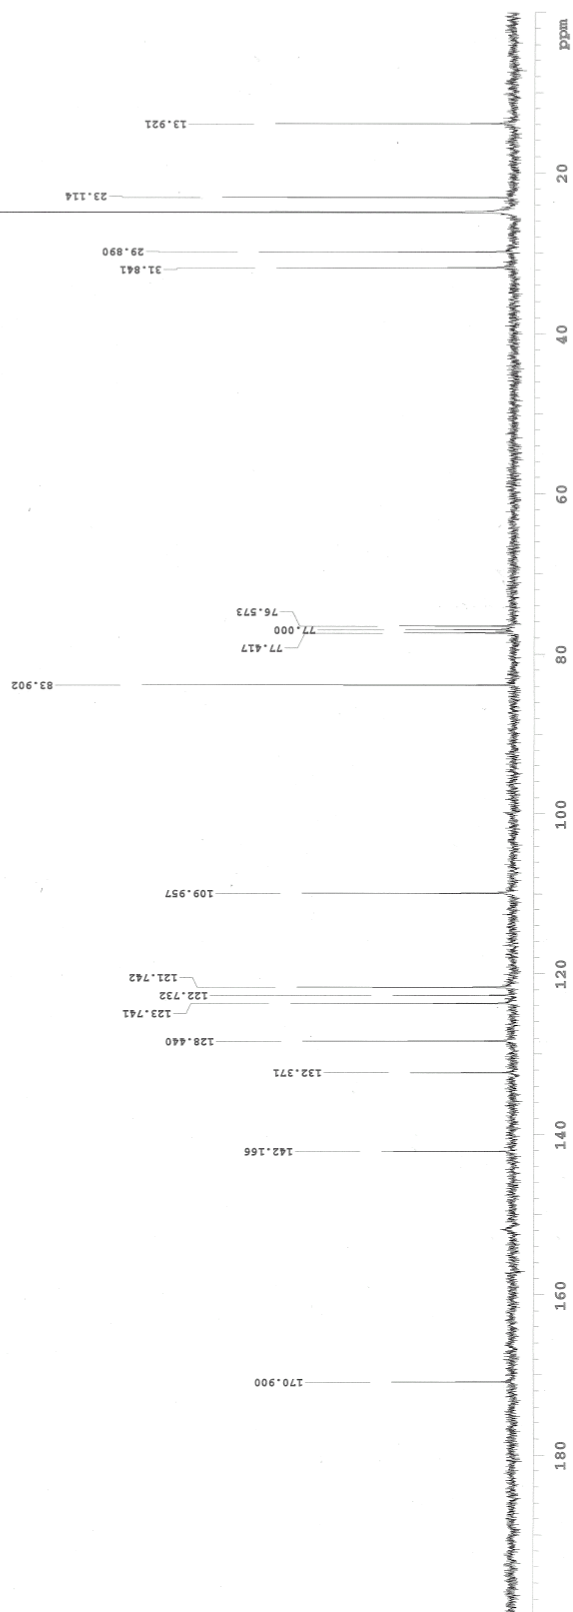

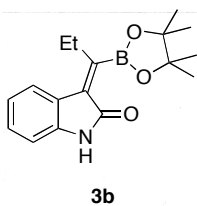

STANDARD IN OBSERVE

Pulse Sequence: s2pul  
 Solvent: CDCl3  
 Ambient temperature  
 GEMINI-300BB "varian2"  
 Relax. delay 1.502 sec  
 Pulse 45.0 degrees  
 Acq. time 3.200 sec  
 Width 5000.0 Hz  
 16 repetitions  
 OBSERVE XL 300.0672328 MHz  
 DATA PROCESSING  
 FT size 32768  
 Total time 1 min, 24 sec

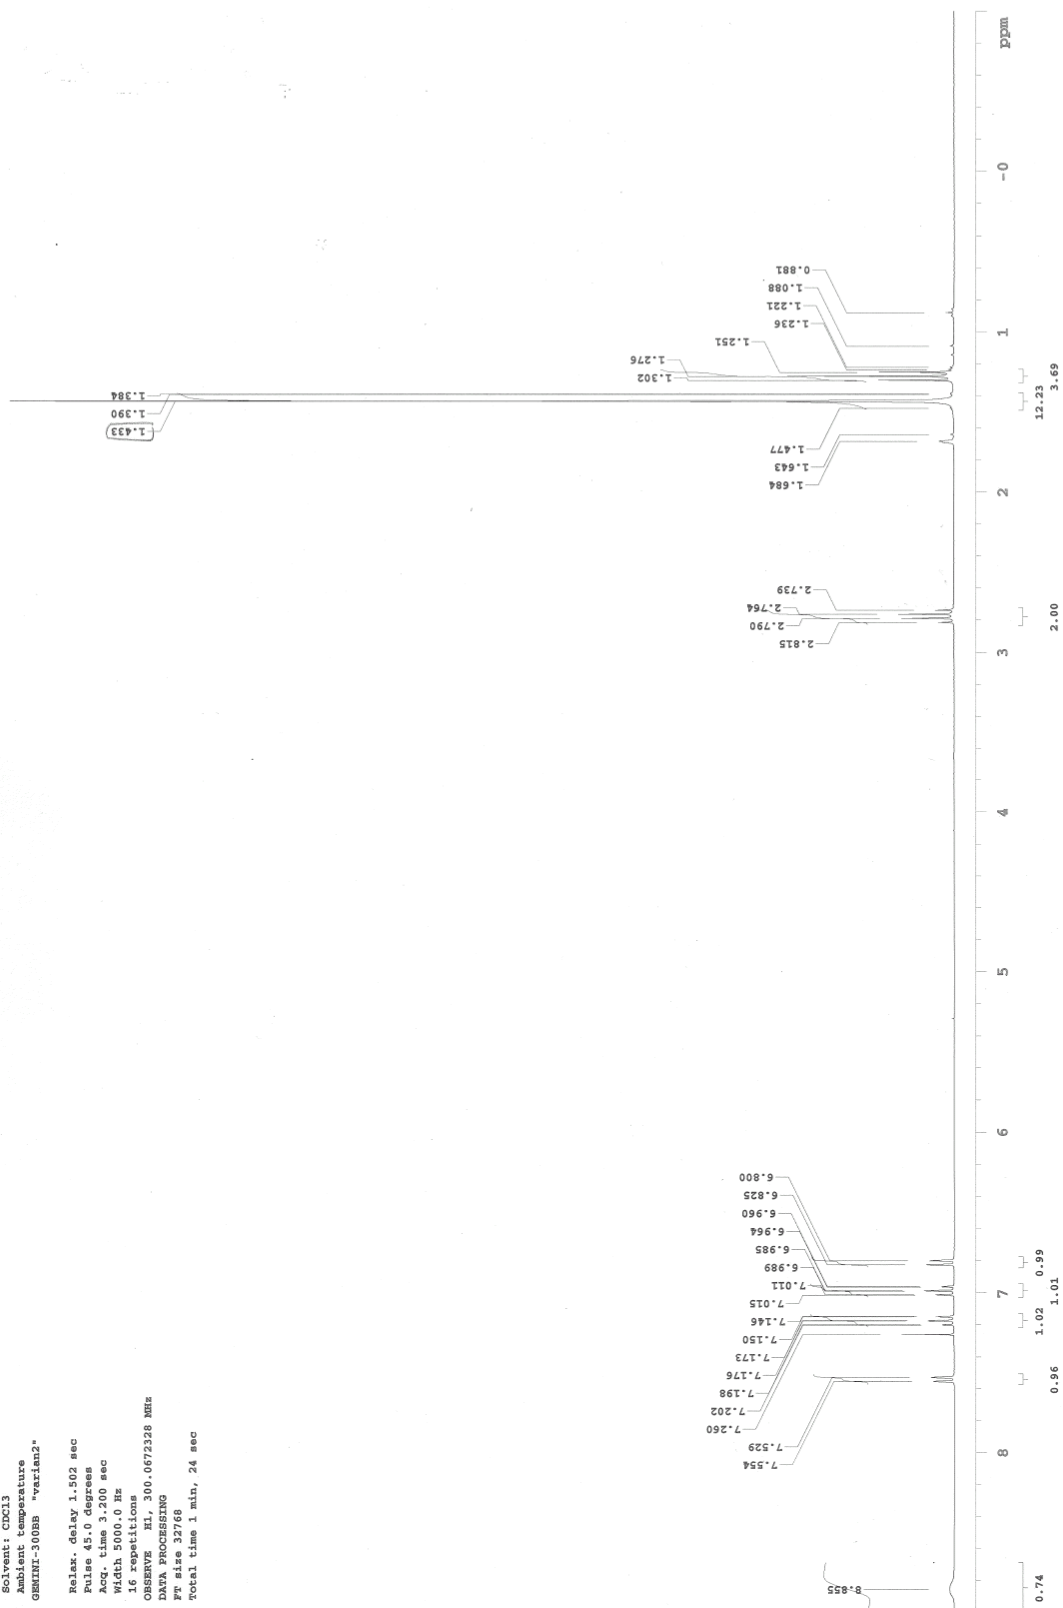

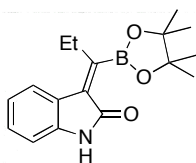

3b

13C OBSERVE

Pulse Sequence: s2pul

Solvent: CDCl3

Ambient temperature

GEMINI-300BB "variant2"

Relax. delay 1.158 sec

Pulse 45.0 degrees

Acq. time 0.842 sec

Width 24000.0 Hz

1964 repetitions

OBSERVE C13, 75.4519703 MHz

DECOUPLE H1, 300.0687335 MHz

Power 37 dB

continuously on

WALTZ-16 modulated

DATA PROCESSING

Acquisition 1.0 Hz

FT date 68536

Total time 37 hr, 16 min, 53 sec

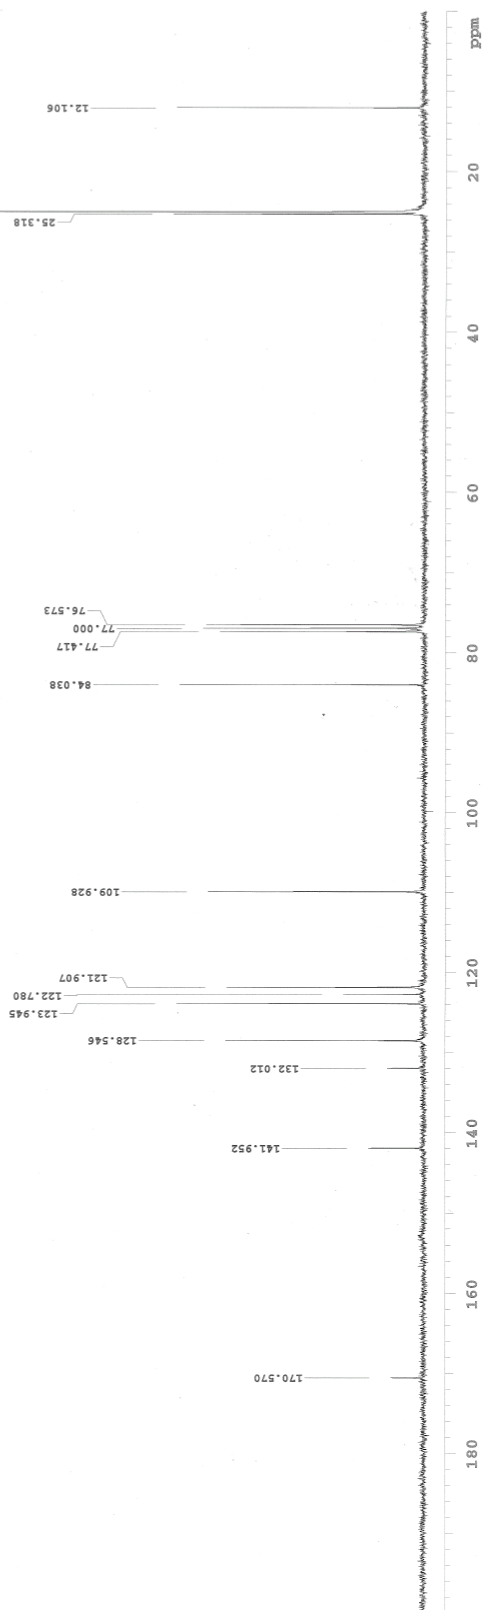

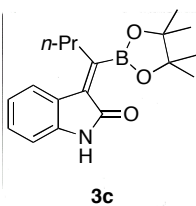

STANDARD IN OBSERVE

Pulse Sequence: #2pul

Solvent: CDCl3

Substance: 3c

Chemical Shift: 300.0672328 MHz

Relax. delay: 1.502 sec

Pulse: 45.0 degrees

Acq. time: 3.200 sec

Width: 5000.0 Hz

6 repetitions

DATA PROCESSING

PR size: 32768

Total time: 1 min, 24 sec

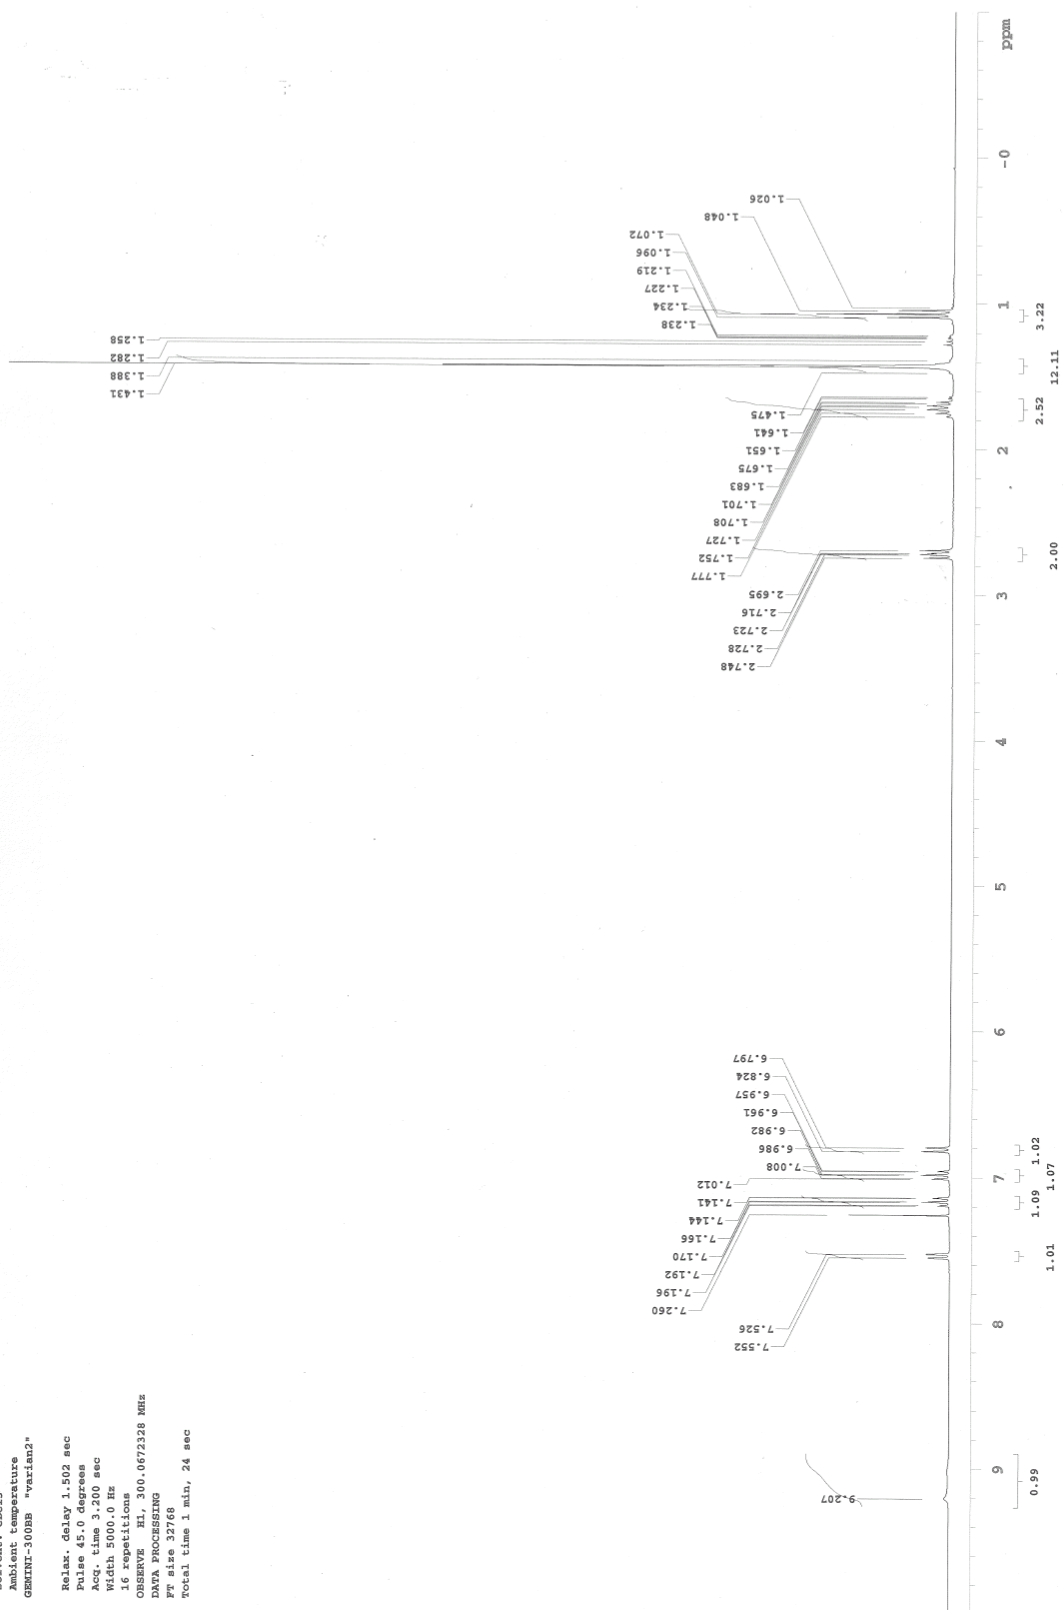

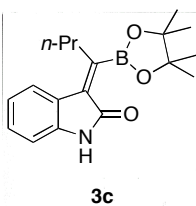

13C OBSERVE

Pulse Sequence: zgpg30

Solvent: CDCl3

Acquisition Temperature

CEM-300WB "Varian2"

Relax. delay 1.158 sec

Pulse 45.0 degrees

Acq. time 0.842 sec

Width 24000.0 Hz

1288 repetitions

Observed 13C, 75.4519710 MHz

Observed 1H, 300.087335 MHz

Decouple 1H

Power 37 dB

continuously on

WALTZ-16 modulated

DATA PROCESSING

Line broadening 1.0 Hz

FT size 65536

Total time 745 hr, 37 min, 52 sec

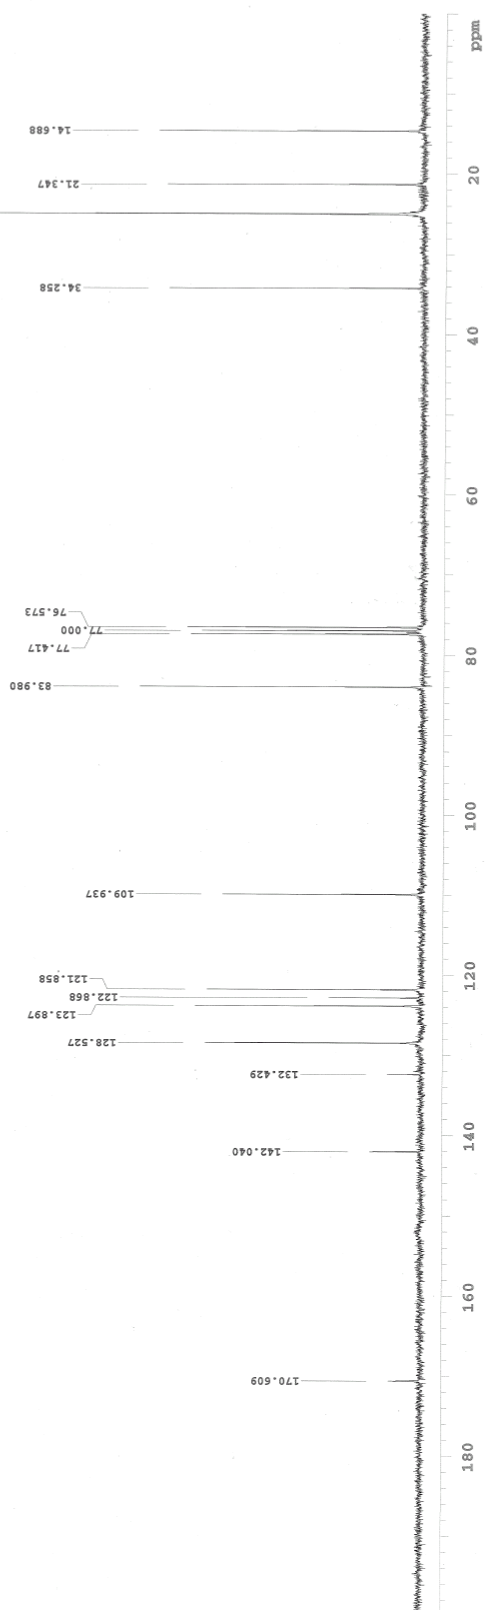

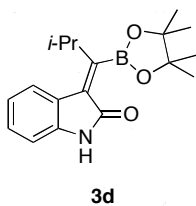

STANDARD IN OBSERVE

Pulse Sequence: a2gn1  
 Solvent: CDCl3  
 Ambient temperature  
 GMSIN-300B5 "varian2"  
 Relax. delay 1.502 sec  
 Pulse 45.0 degrees  
 Acq. time 3.200 sec  
 Width 5000.0 Hz  
 16 repetitions  
 OBSERVE HL 300.0672331 MHz  
 DATA PROCESSING  
 File 32706  
 Total time 1 min, 24 sec

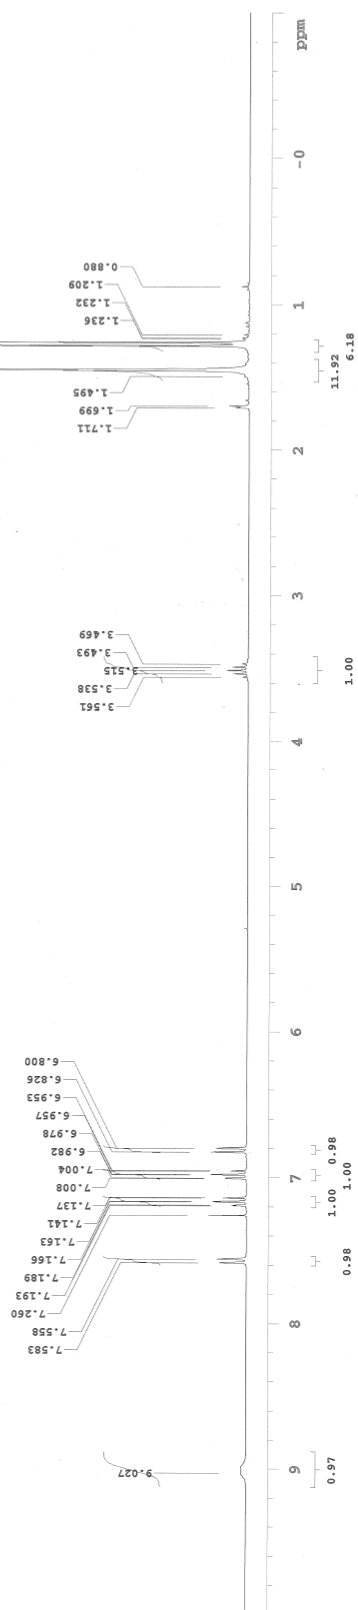



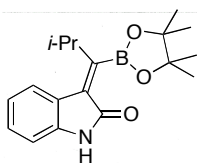

3d

13C OBSERVE

Pulse Sequence: s2pul  
 Solvent: CDCl3  
 Ambient temperature  
 GEMINI-300DB "variant2"  
 Relax. delay 1.158 sec  
 Pulse 45.0 degrees  
 Acq. time 0.842 sec  
 Width 24000.0 Hz  
 2828 repetitions  
 OBSERVE c13, 75.4519710 MHz  
 DECOUPLE H1, 300.0667335 MHz  
 Power 37 dB  
 continuously on  
 WALTZ-16 modulated  
 DATA PROCESSING  
 Line processing 1.0 Hz  
 FT resolution 0.32 Hz  
 Total time 74 hr, 33 min, 47 sec

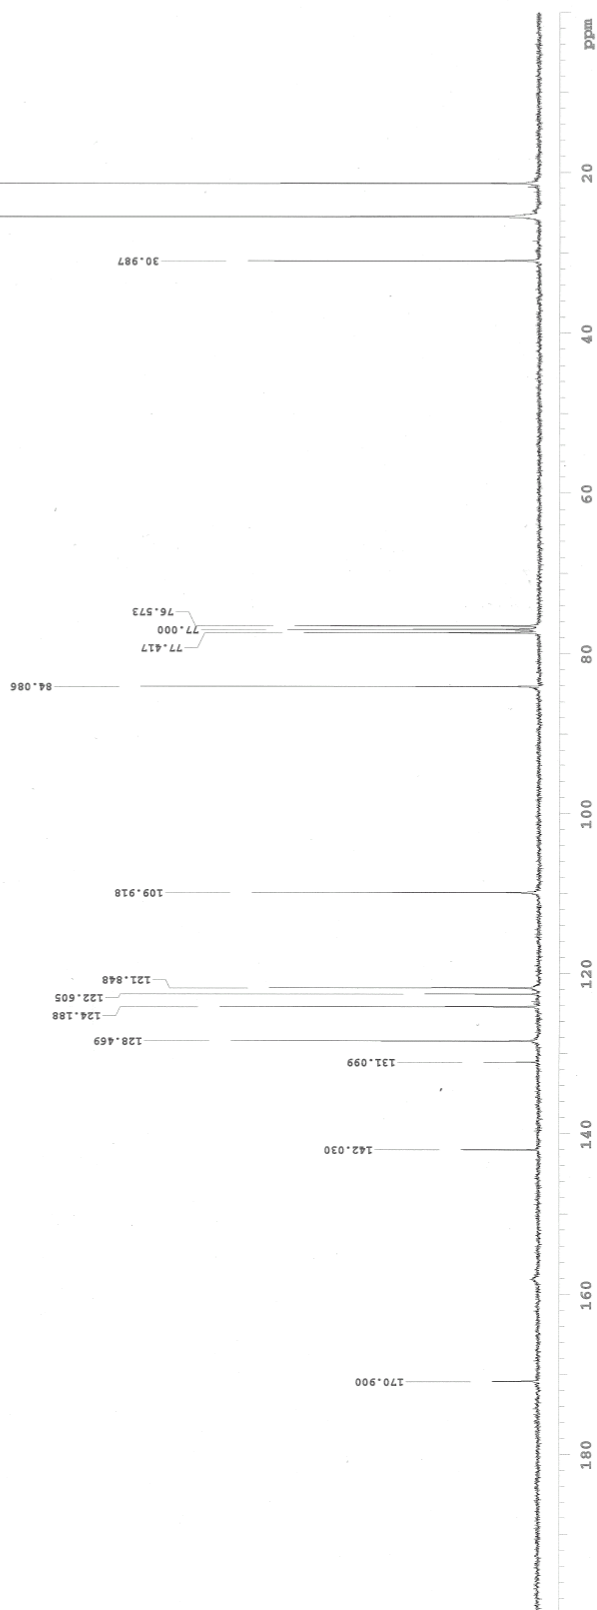

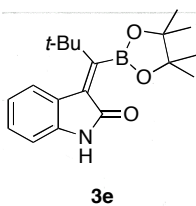

STANDARD 1H OBSERVE

Pulse sequence: s2pul  
 Solvent: CDCl3  
 Ambient temperature  
 GEMINI-300B8 "variant2"  
 Relax. delay 1.502 sec  
 Pulse 45.0 degrees  
 Acq. time 3.200 sec  
 Width 5000.0 Hz  
 28 repetitions  
 OBSERVE M1, 300.0672328 MHz  
 DATA PROCESSING  
 FT size 32768  
 Total time 8 min, 46 sec

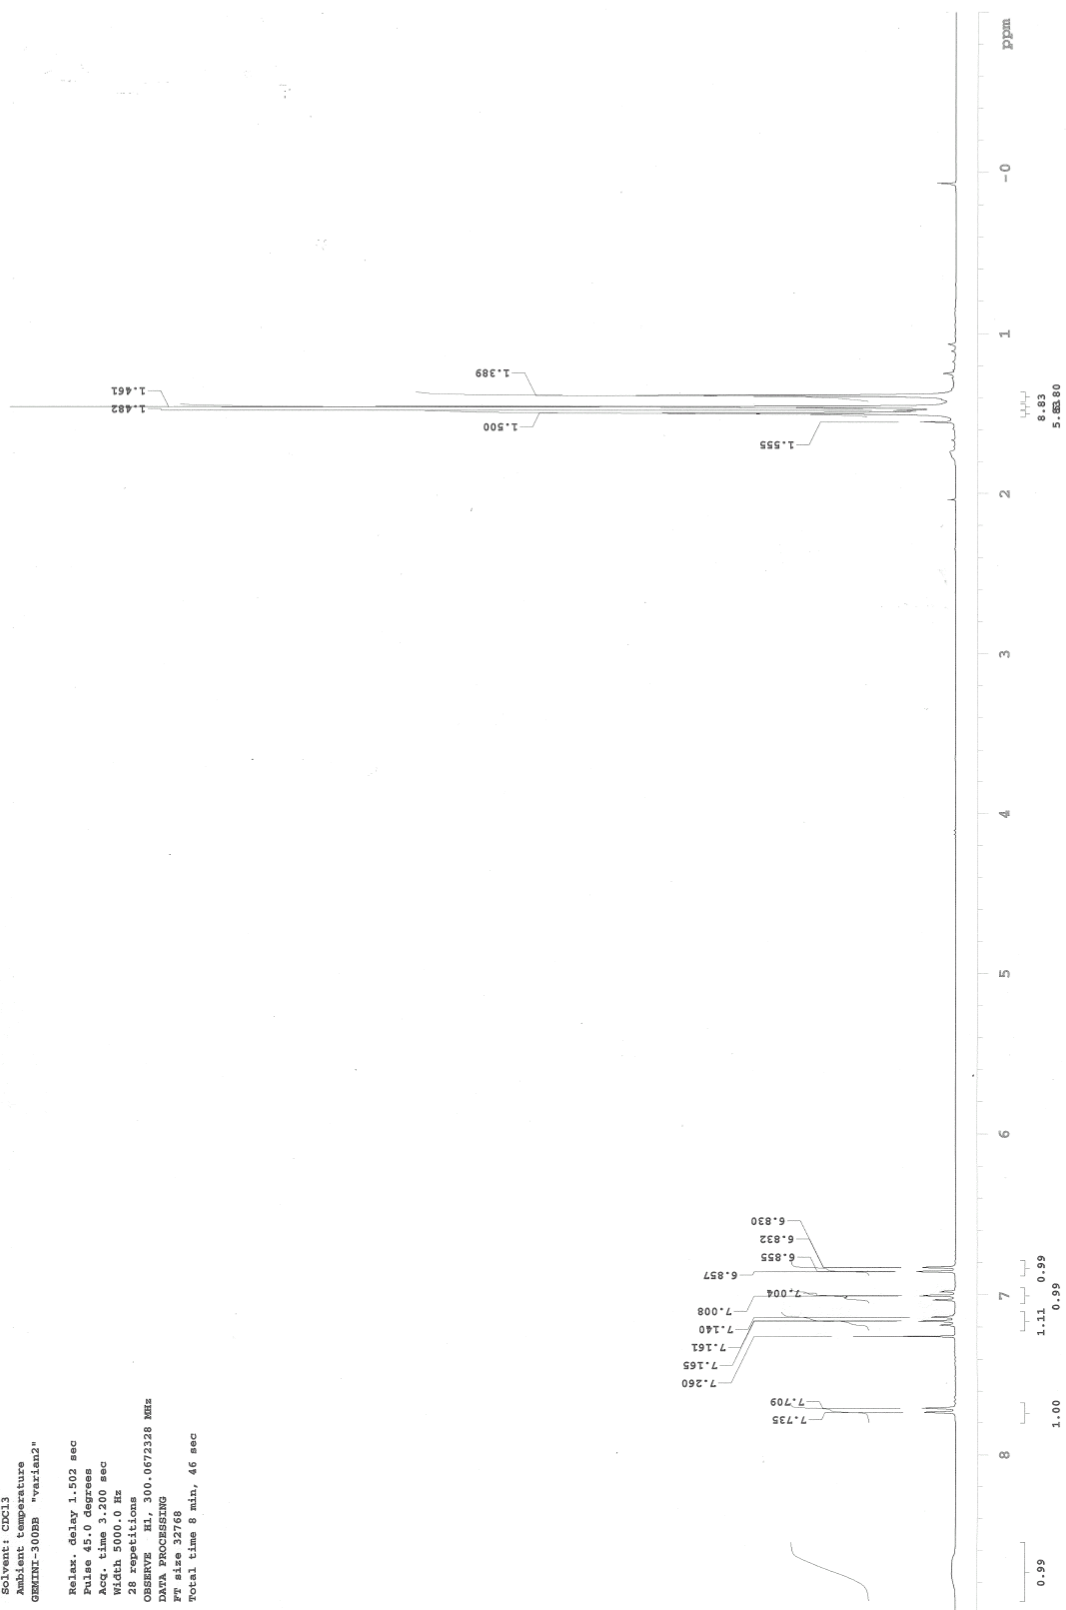

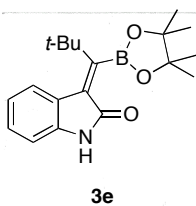

13C OBSERVE

Pulse Sequence: s2pul  
 Solvent: CDCl3  
 Ambient Temperature  
 GEMIN-300DB "variant2"  
 Relax. delay 1.158 sec  
 Pulse 45.0 degrees  
 Acq. time 0.842 sec  
 Width 24000.0 Hz  
 13016 repetitions  
 OBSERVE C13, 75.4519703 MHz  
 DECOUPLE H1, 300.0687335 MHz  
 Power 37 dB  
 continuously on  
 WALTZ-16 modulated  
 DATA PROCESSING  
 Line broadening 1.0 Hz  
 FT size 65536  
 Total time 7456 hr, 18 min, 44 sec

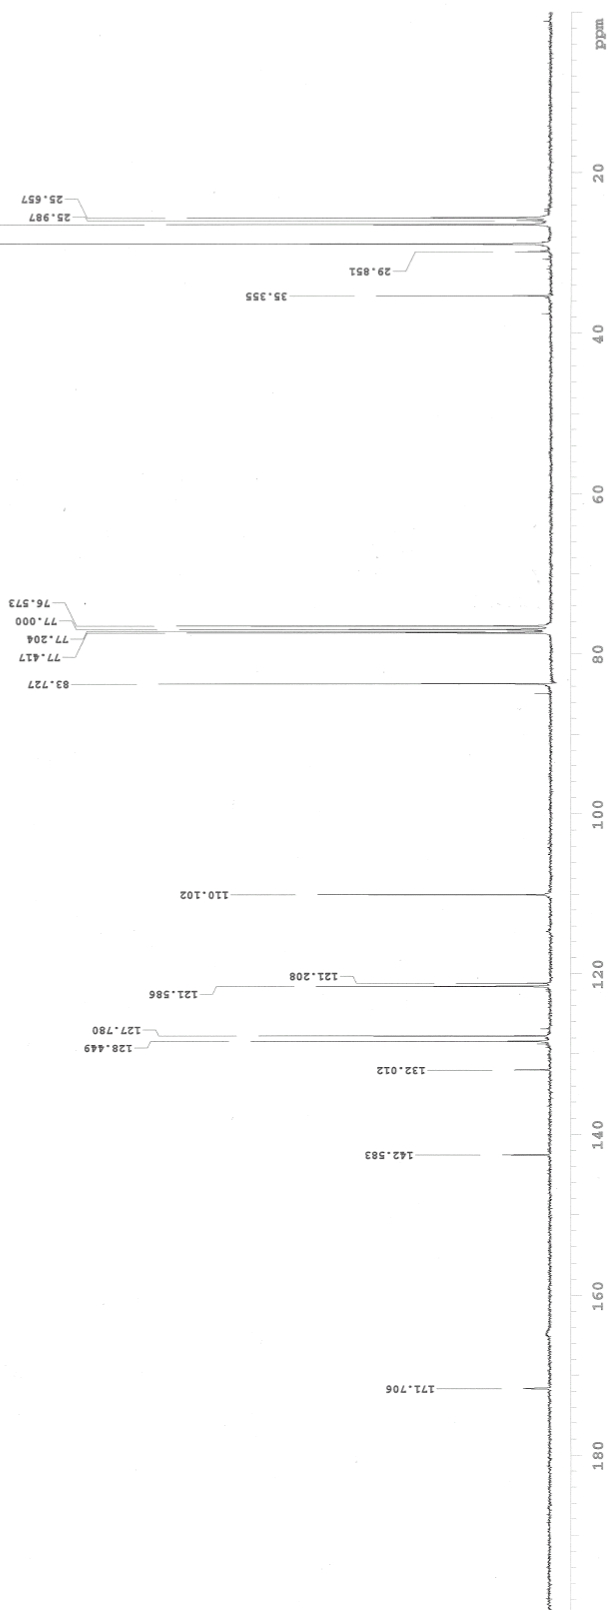

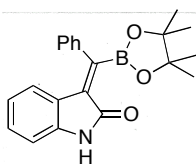

3f

STANDARD 1H OBSERVE

Pulse sequence: #2pul

Solvent: CDCl3

Ambient temperature

GEMINI-300BB "variant2"

Relax. delay 1.502 sec

Pulse 45.0 degrees

Acq. time 3.200 sec

Width 5000.0 Hz

16 Repetitions

OBSERVE H1, 300.0672334 MHz

DATA PROCESSING

Ft size 32768

Total time 1 min, 24 sec

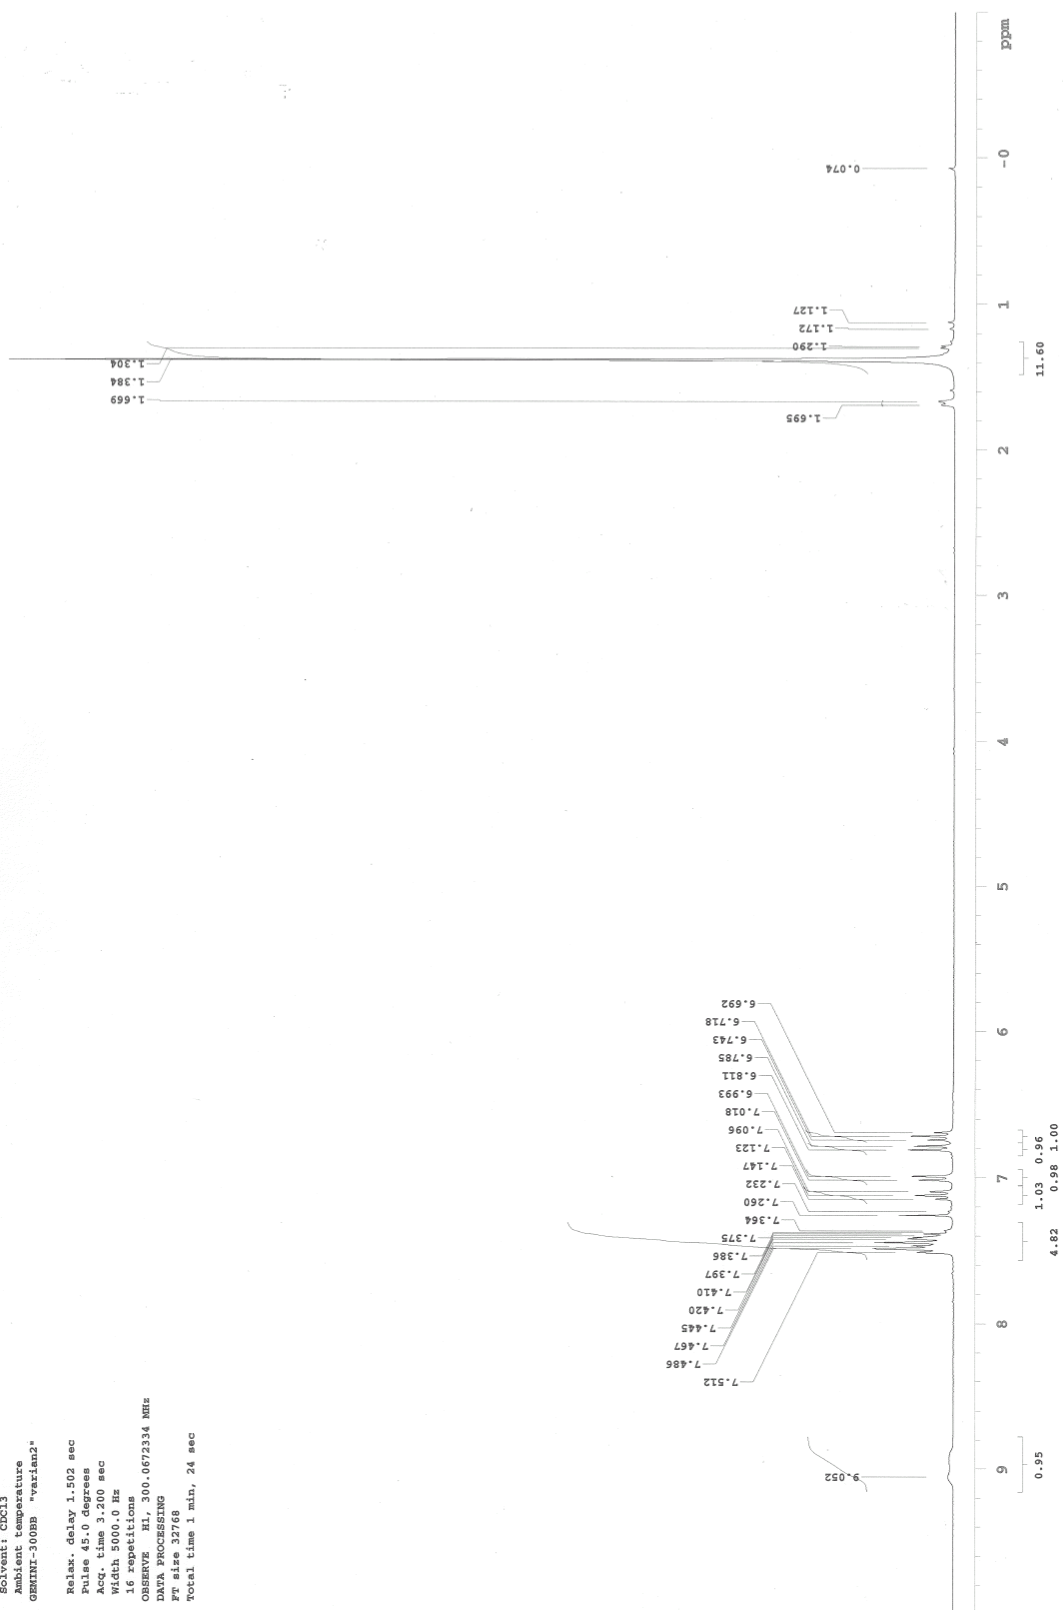

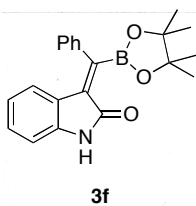

13C OBSERVE

Pulse Sequence: s2pul

Solvent: CDCl3

Ambient temperature

gemin-300DB "variant2"

Relax. delay 1.158 sec

Pulse 45.0 degrees

Acq. time 0.842 sec

Width 24000.0 Hz

10628 repetitions

OBSERVE C13, 75.4519710 MHz

DECOUPLE H1, 300.0687335 MHz

Power 37 dB

continuously on

WALTZ-16 modulated

DATA PROCESSING

Line broadening 1.0 Hz

Phase 0.00000000

Total time 745 hr, 37 min, 52 sec

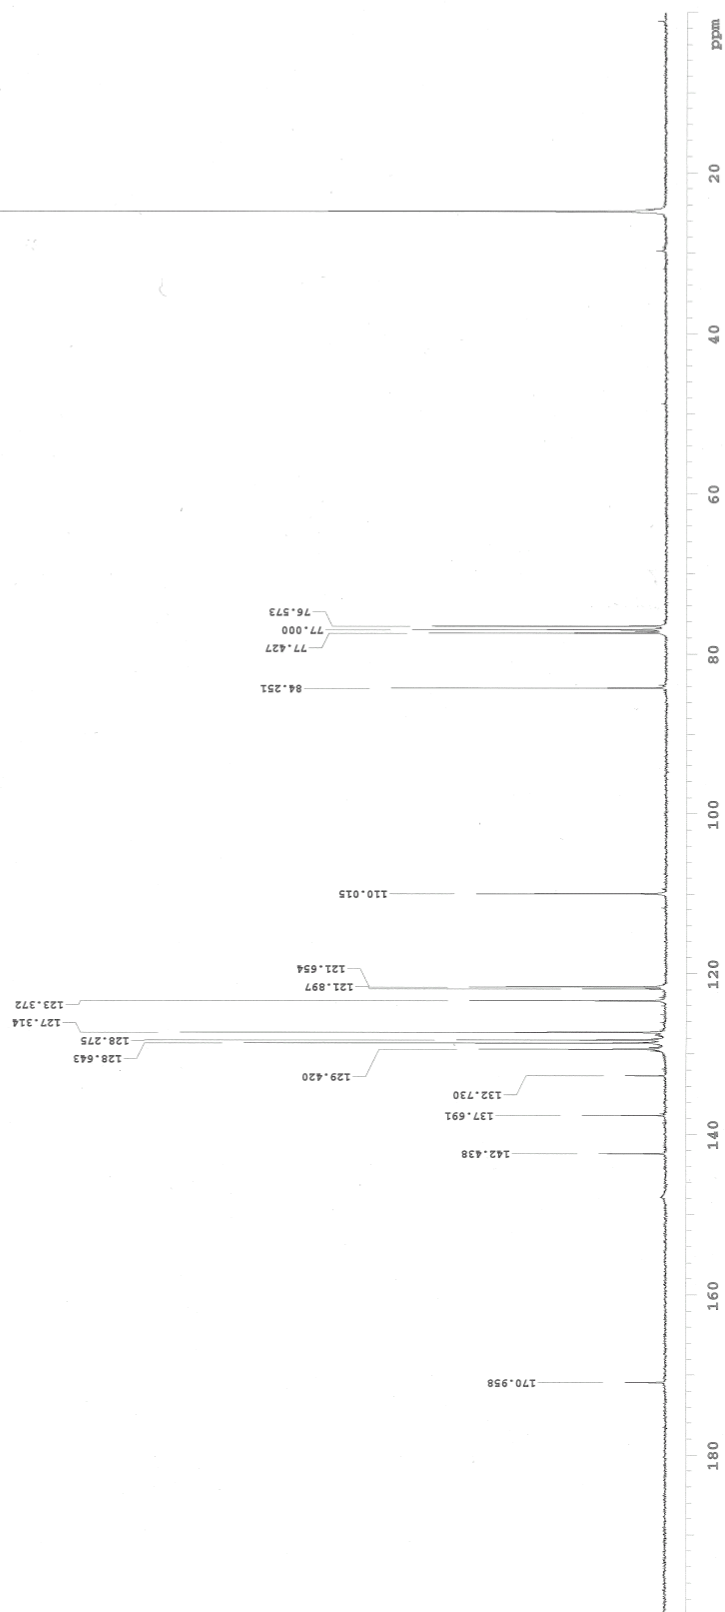

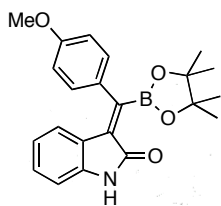

3g

STANDARD 1H OBSERVE

Pulse Sequence: s2pul

Solvent: CDCl3

Ambient temperature

QNP1H-300MHz "varian2"

Relax. delay 1.502 sec

Pulse 45.0 degrees

Acq. time 3.200 sec

Width 5000.0 Hz

16 repetitions

OBSERVE H1, 300.0672328 MHz

DATA PROCESSING

FT size 32768

Total time 1 min, 24 sec

3.873

11.96

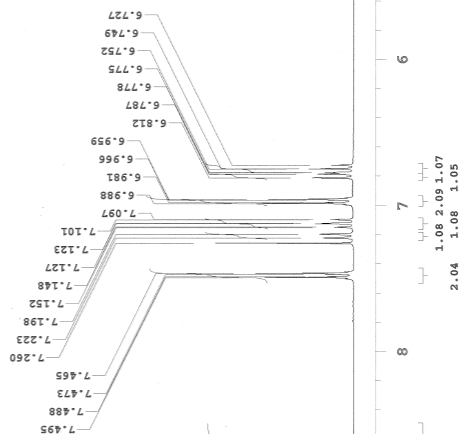

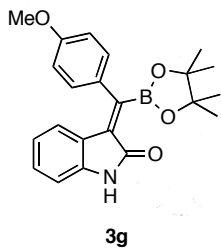

13C OBSERVE

Pulse Sequence: s2pul  
 Solvent: CDCl3  
 Ambient temperature  
 GEMINI-300BB "varian2"  
 Relax. delay 1.158 sec  
 Pulse 45.0 degrees  
 Acq. time 0.542 sec  
 Width 24000.0 Hz  
 484 repetitions  
 OBSERVE c13, 75.4519732 MHz  
 DECOUPLE H1, 300.0667335 MHz  
 Power 37 dB  
 continuously on  
 WALTZ-16 modulated  
 DATA PROCESSING  
 Line broadening 1.0 Hz  
 FT size 65536  
 Total time 44 min, 44 sec

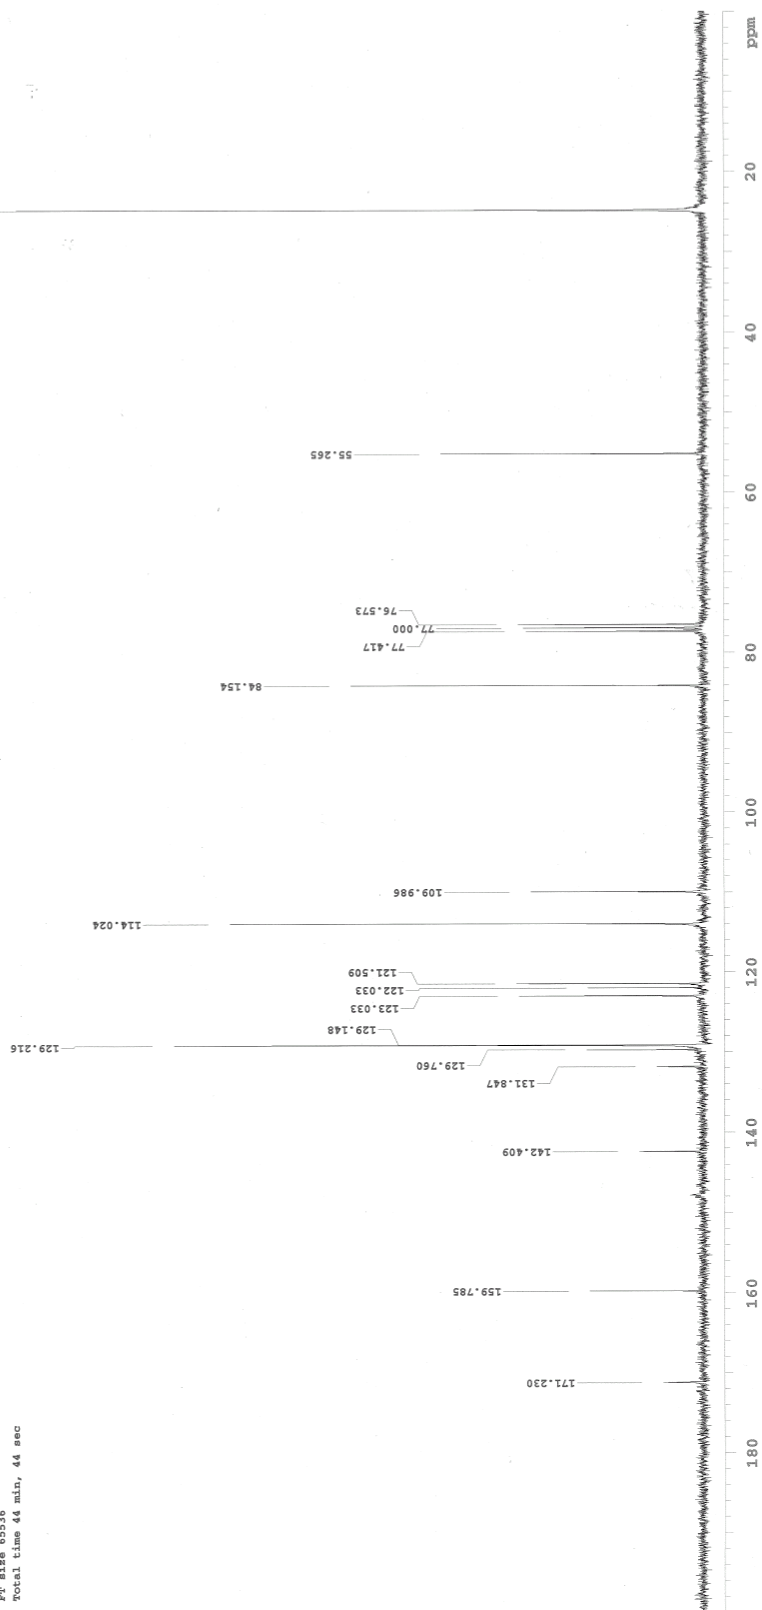

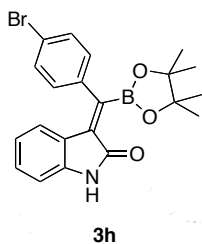

# STANDARD 1H OBSERVE

Pulse Sequence: s2pul  
 Solvent: CDCl3  
 Ambient temperature  
 GEMINI-300BB "varian2"  
 Relax. delay 1.502 sec  
 Pulse 45.0 degrees  
 Acq. time 3.200 sec  
 Width 5000.0 Hz  
 16 repetitions  
 OBSERVE HL 300.0672331 MHz  
 DATA PROCESSING  
 FT size 32768  
 Total time 1 min, 24 sec

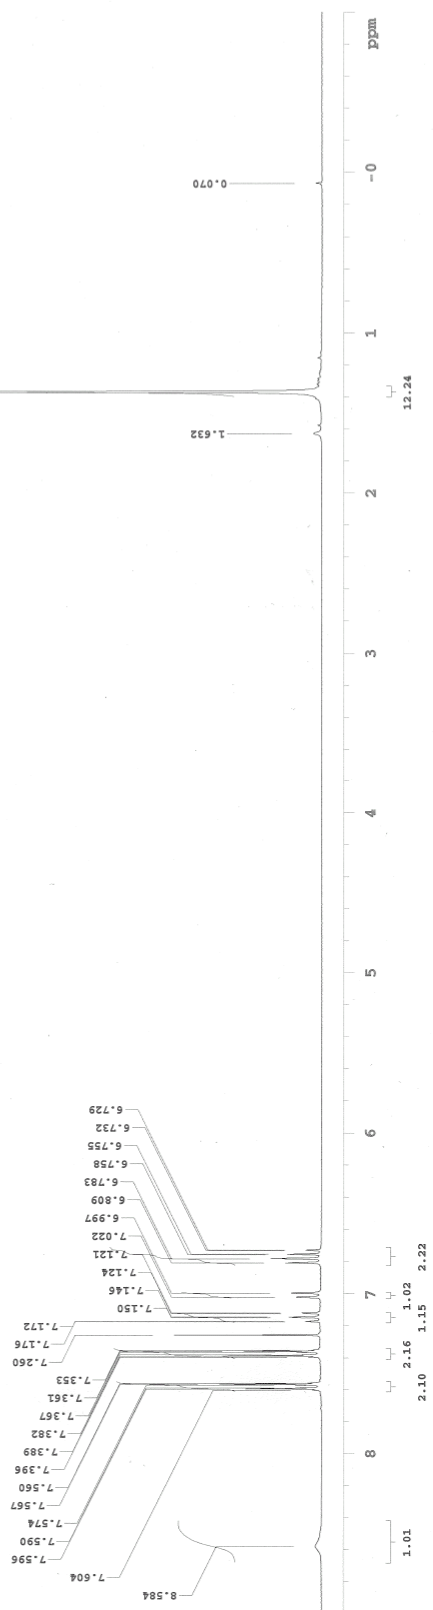



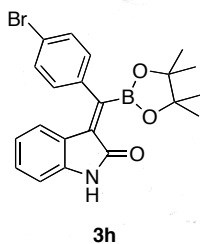

13C OBSERVE

Pulse Sequence: s2pul  
 Solvent: CDCl3  
 Ambient temperature  
 GEMINI-300BB "varian2"  
 Relax. delay 1.158 sec  
 Pulse 45.0 degrees  
 Acq. time 0.842 sec  
 Width 24000.0 Hz  
 11720 repetitions  
 OBSERVE C13, 75.4519703 MHz  
 DECOUPLE H1, 300.0687335 MHz  
 Power 37 dB  
 continuously on  
 WALTZ-16 modulated  
 DATA PROCESSING  
 Line broadening 1.0 Hz  
 Gain 6.595  
 Total time 745 hr, 37 min, 52 sec

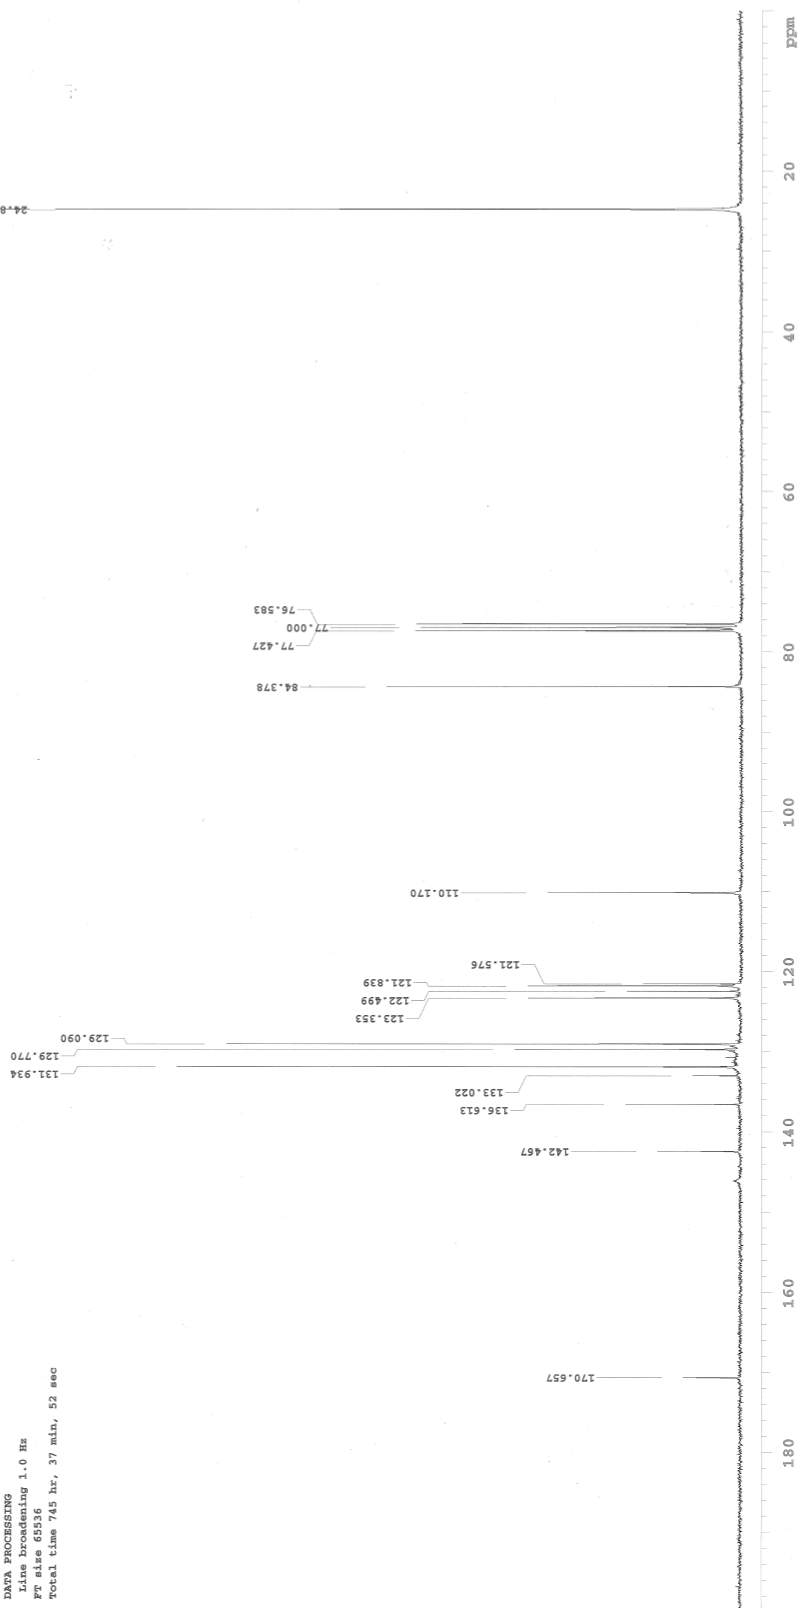

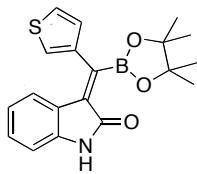

3i

STANDARD IN OBSERVE

Pulse Sequence: s2pul  
Solvent: CDCl3  
Ambient Temperature  
GEMIN-300DBB "variant2"  
Relax. delay 1.502 sec  
Pulse 45.0 degrees  
Acq. time 3.200 sec  
Width 5000.0 Hz  
16 repetitions  
OBSERVE ML, 300.0672328 MHz  
DATA PROCESSING  
Ft size 32768  
Total time 1 min, 24 sec

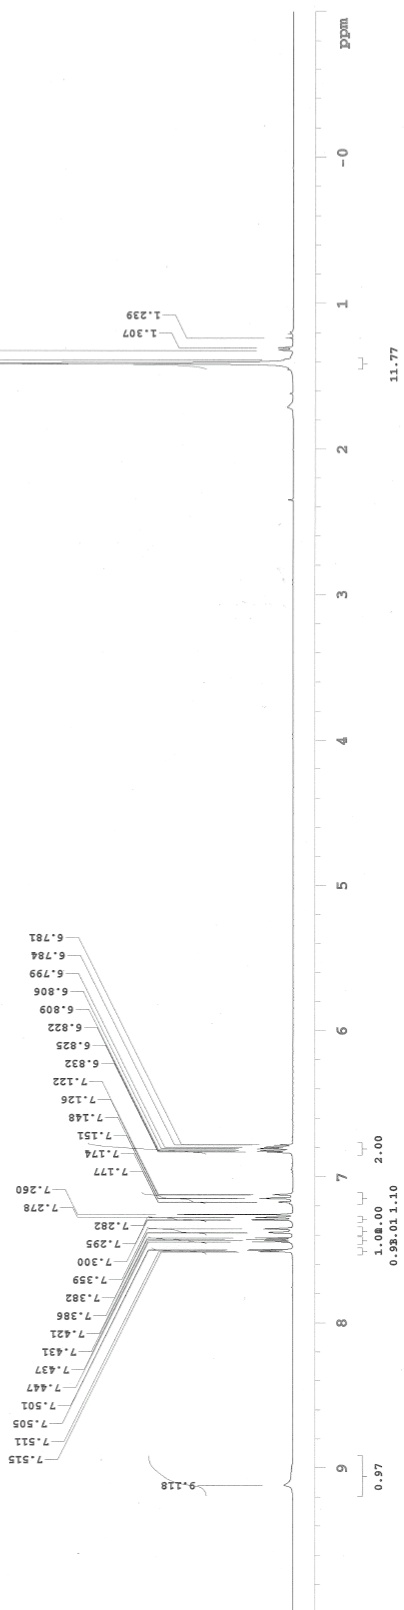

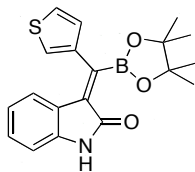

3i

13C OBSERVE

Pulse Sequence: s2pul  
 Solvent: CDCl3  
 Ambient temperature  
 GEMINI-300DB "varian2"  
 Relax. delay 1.158 sec  
 Pulse 45.0 degrees  
 Acq. time 0.842 sec  
 Width 24000.0 Hz  
 680 repetitions  
 OBSERVE C13, 75.4519732 MHz  
 DECOUPLE H1, 300.0687335 MHz  
 Power 37 dB  
 continuously on  
 WALTZ-16 modulated  
 DATA PROCESSING  
 Line broadening 1.0 Hz  
 FT size 65536  
 Total time 743 hr, 37 min, 52 sec

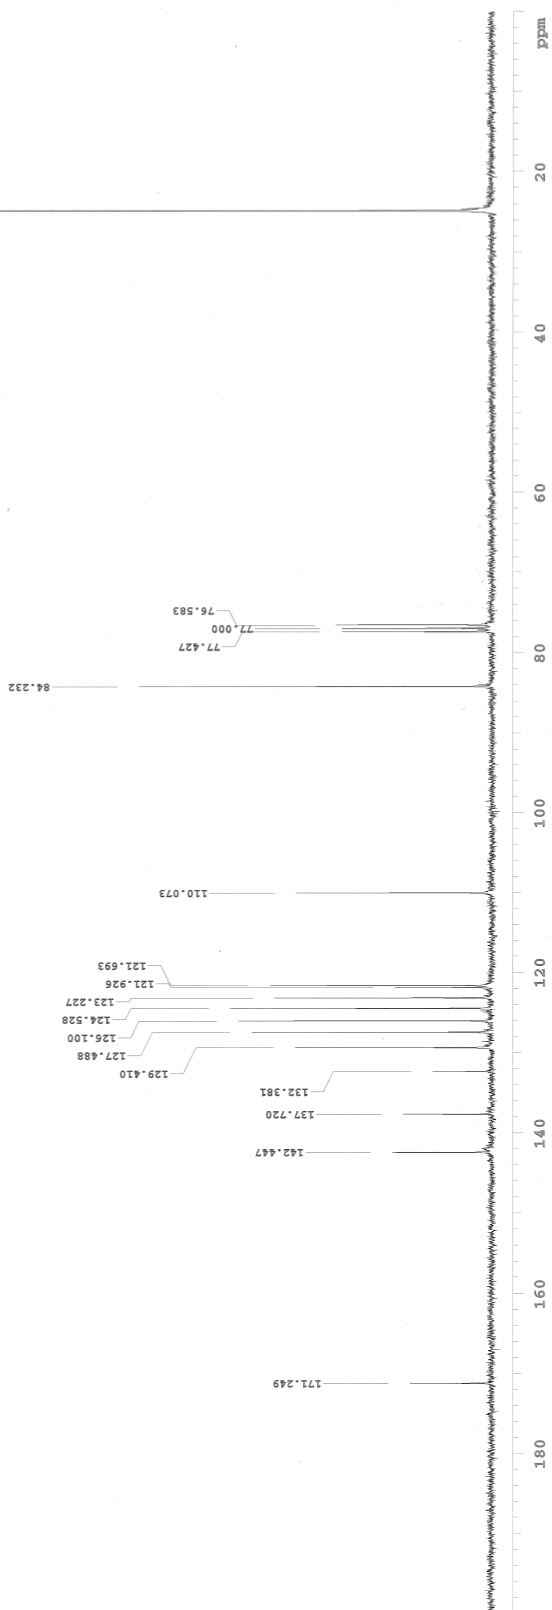

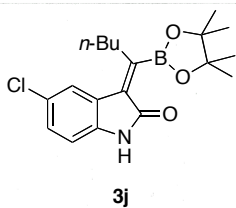

# STANDARD 1H OBSERVE

Pulse Sequence: s2pul  
 Solvent: CDCl3  
 Ambient Temperature  
 GEMIN-300DB "variant2"  
 Relax. delay 1.502 sec  
 Pulse 45.0 degrees  
 Acq. time 3.200 sec  
 Width 5000.0 Hz  
 16 repetitions  
 OBSERVE M1, 300.0672331 MHz  
 DATA PROCESSING  
 FT size 32768  
 Total time 1 min, 24 sec

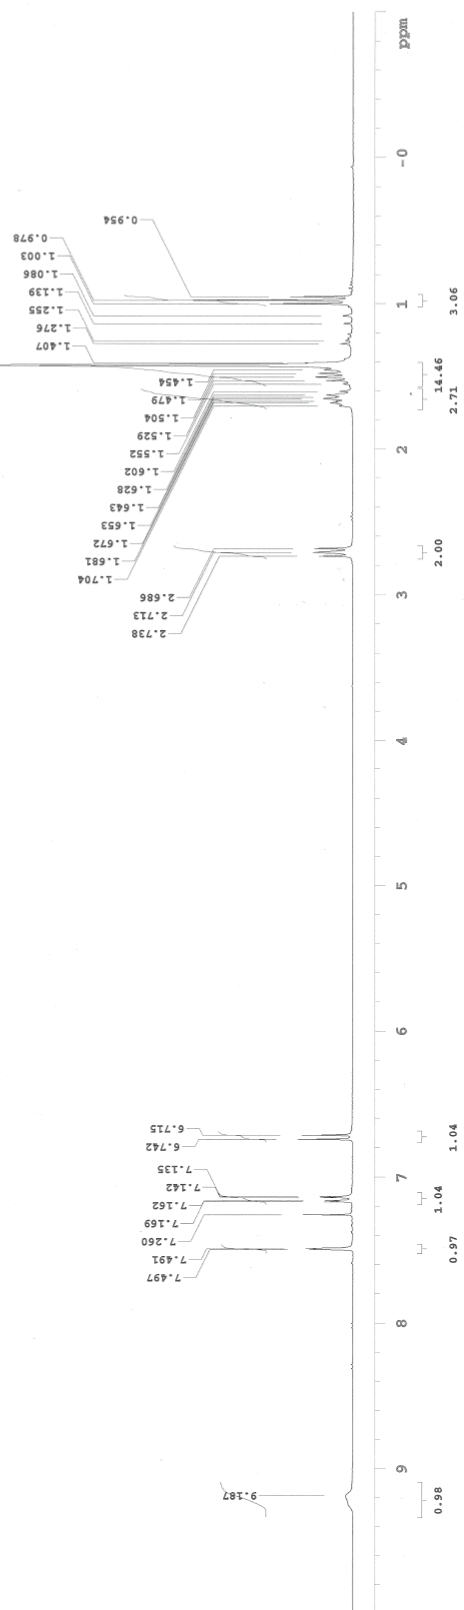

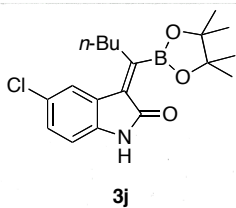

13C OBSERVE

Pulse sequence: s2pul  
 Solvent: CDCl3  
 Ambient temperature  
 GEMINI-300BB "variant2"  
 Relax. delay 1.158 sec  
 Pulse 45.0 degrees  
 Acq. time 0.842 sec  
 Width 24000.0 Hz  
 600 repetitions  
 OBSERVE C13, 75.4519703 MHz  
 DECOUPLE H1, 300.0667335 MHz  
 Power 37 dB  
 continuously on  
 WALTZ-16 modulated  
 DATA PROCESSING  
 Line broadening 1.0 Hz  
 FT size 65536  
 Total time 745 hr, 37 min, 52 sec

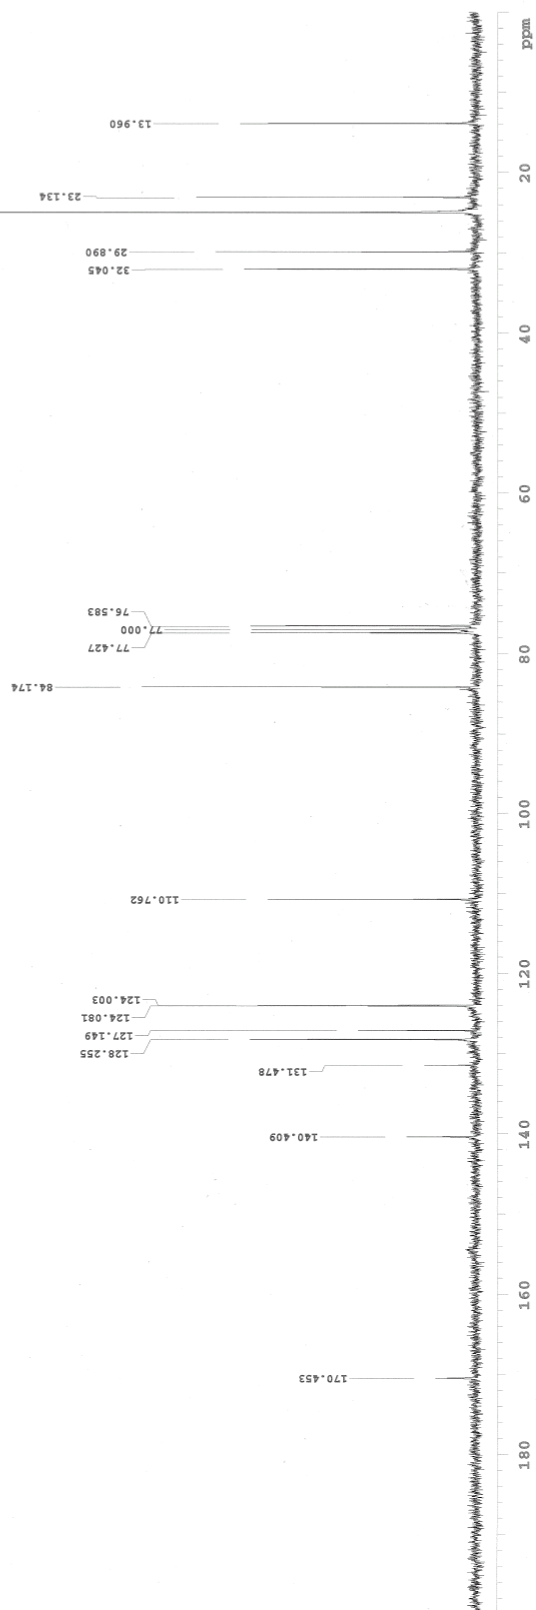

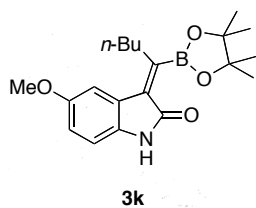

STANDARD IN OBSERVE

Pulse Sequence: s2pul  
 Solvent: CDCl3  
 Ambient temperature  
 GEMINI-300BB "varian2"  
 Relax. delay 1.502 sec  
 Pulse 45.0 degrees  
 Acq. time 3.200 sec  
 Width 5000.0 Hz  
 16 repetitions  
 OBSERVE H1, 300.0672328 MHz  
 DATA PROCESSING  
 F1 size 32768  
 Total time 1 min, 24 sec

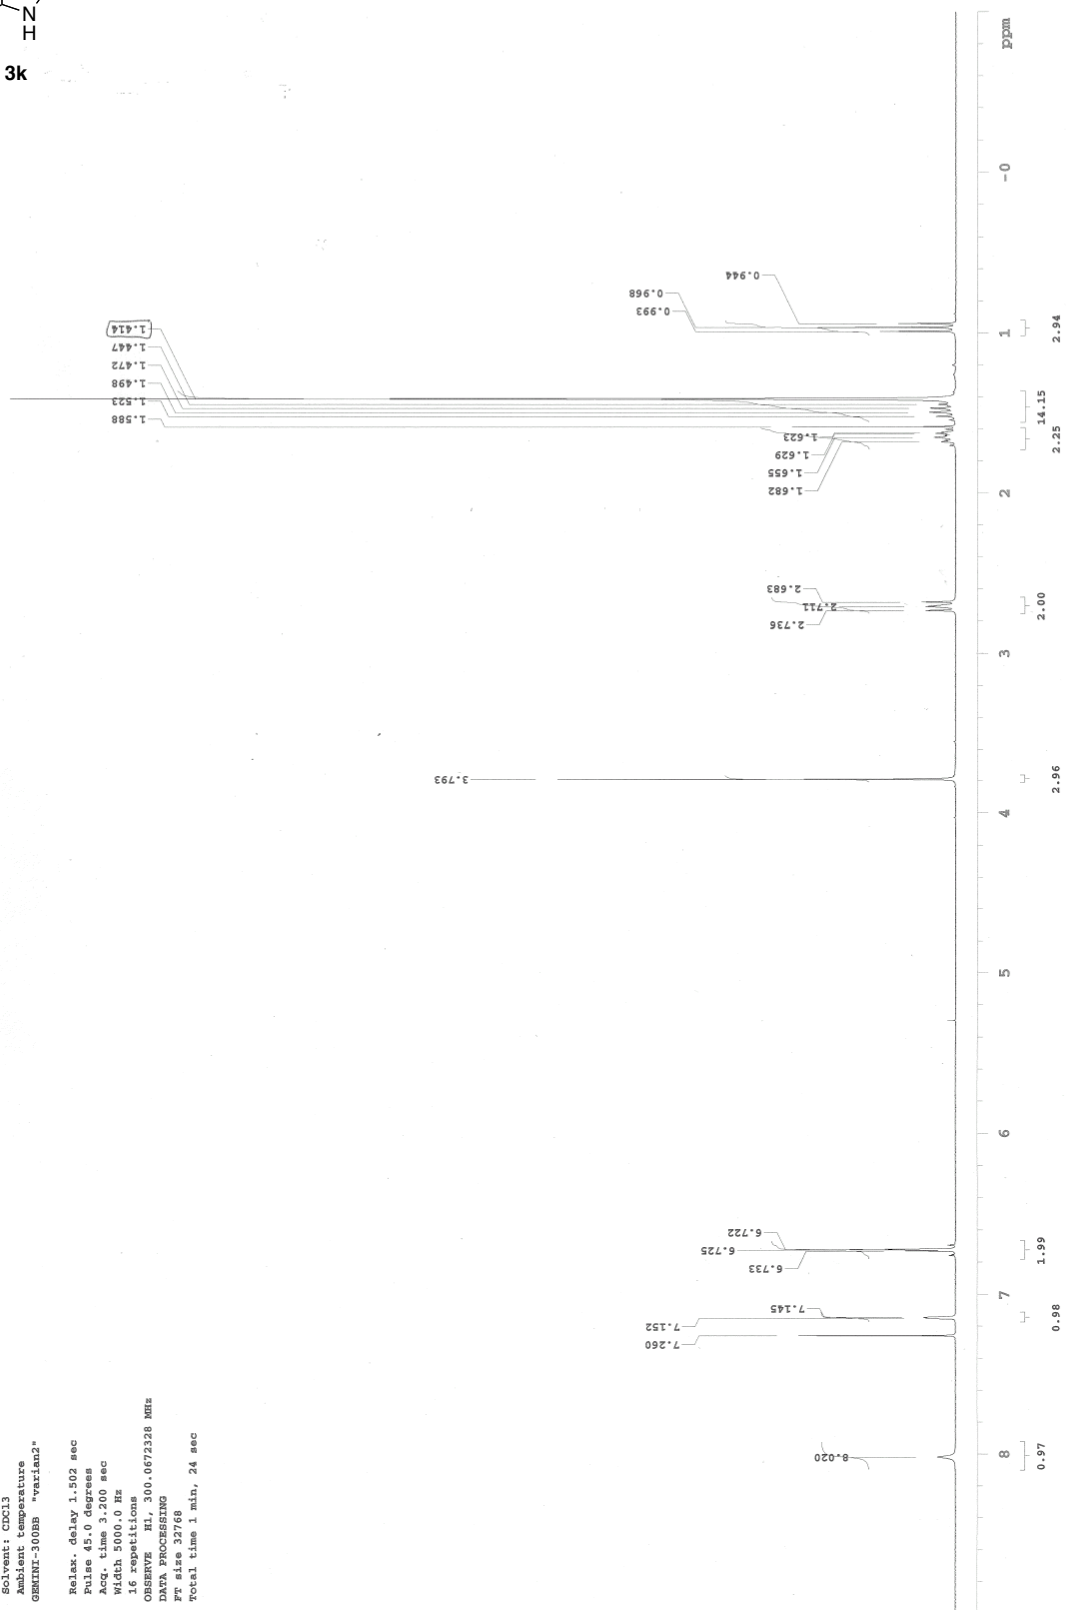

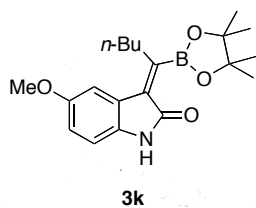

13C OBSERVE

Pulse Sequence: s2pul  
 Solvent: CDCl3  
 Ambient temperature  
 GEMINI-300DB "varian2"  
 Relax. delay 1.158 sec  
 Pulse 45.0 degrees  
 Acq. time 0.842 sec  
 Width 24000.0 Hz  
 348 repetitions  
 OBSERVE C13, 75.4519718 MHz  
 DECOUPLE H1, 300.0687335 MHz  
 Power 37 dB  
 continuously on  
 WALTZ-16 modulated  
 DATA PROCESSING  
 Line broadening 1.0 Hz  
 FT size 65536  
 Total time 22 min, 22 sec

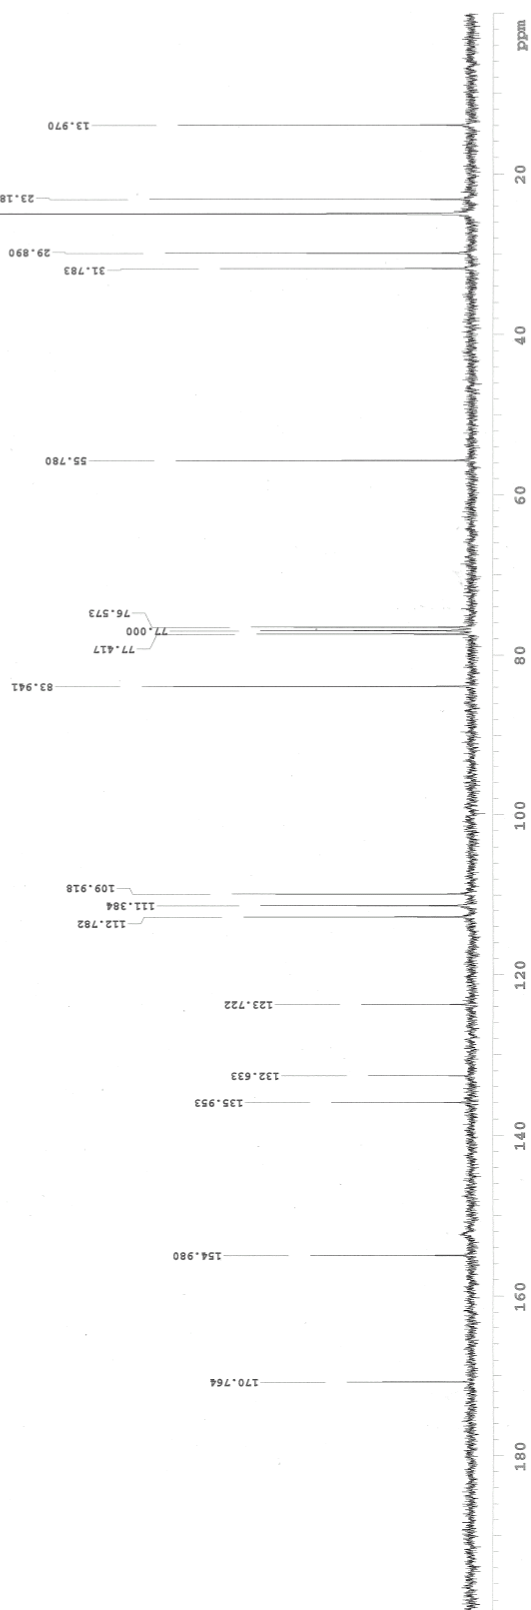

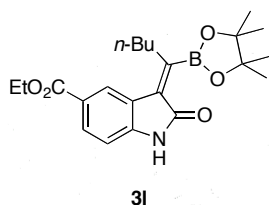

# STANDARD IN OBSERVE

Pulse Sequence: s2pul  
 Solvent: CDCl3  
 Ambient temperature  
 GEMINI-300DB "varian2"  
 Relax. delay 1.502 sec  
 Pulse 45.0 degrees  
 Acq. time 3.200 sec  
 Width 5000.0 Hz  
 16 repetitions  
 OBSERVE H1, 300.0672331 MHz  
 DATA PROCESSING  
 FT size 32768  
 Total time 1 min, 24 sec

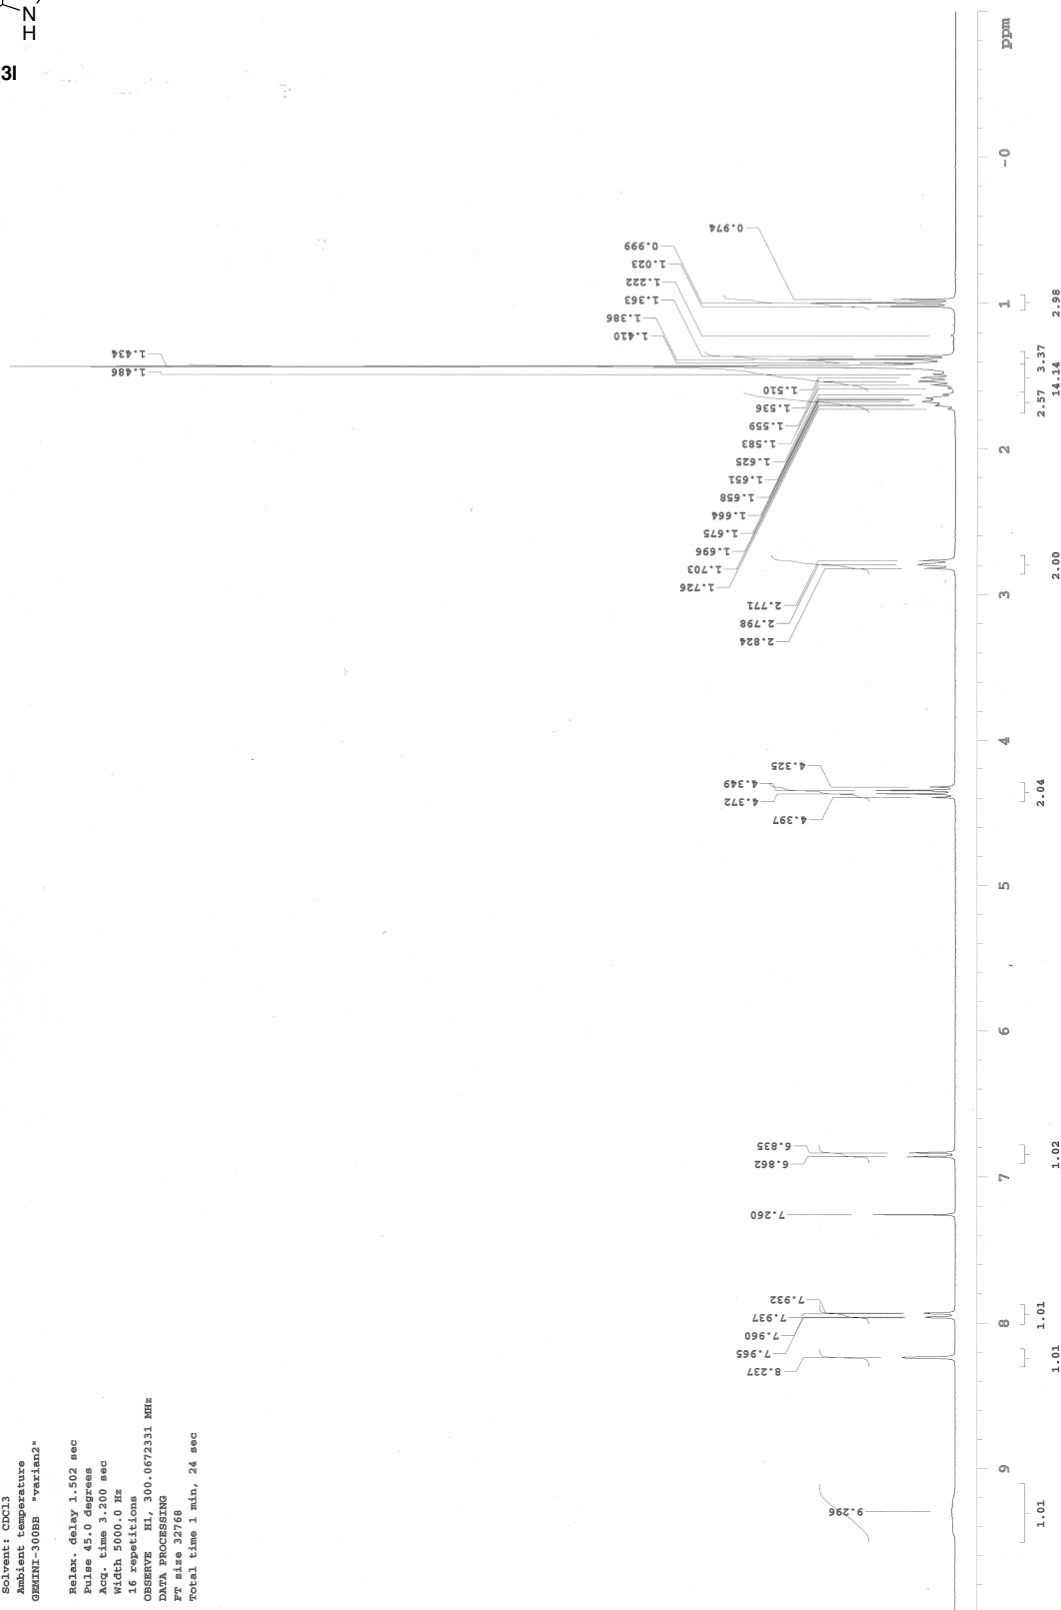



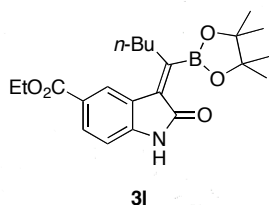

13C OBSERVE

Pulse sequence: s2pul  
 Solvent: CDCl3  
 Ambient temperature  
 GEMINI-300BB "variant2"  
 Relax. delay 1.158 sec  
 Pulse 45.0 degrees  
 Acq. time 0.842 sec  
 Width 24000.0 Hz  
 436 repetitions  
 OBSERVE C13, 75.4519710 MHz  
 DECOUPLE H1, 300.0667335 MHz  
 Power 37 dB  
 continuously on  
 WALTZ-16 modulated  
 DATA PROCESSING  
 Line broadening 1.0 Hz  
 FT size 65536  
 Total time 22 min, 22 sec

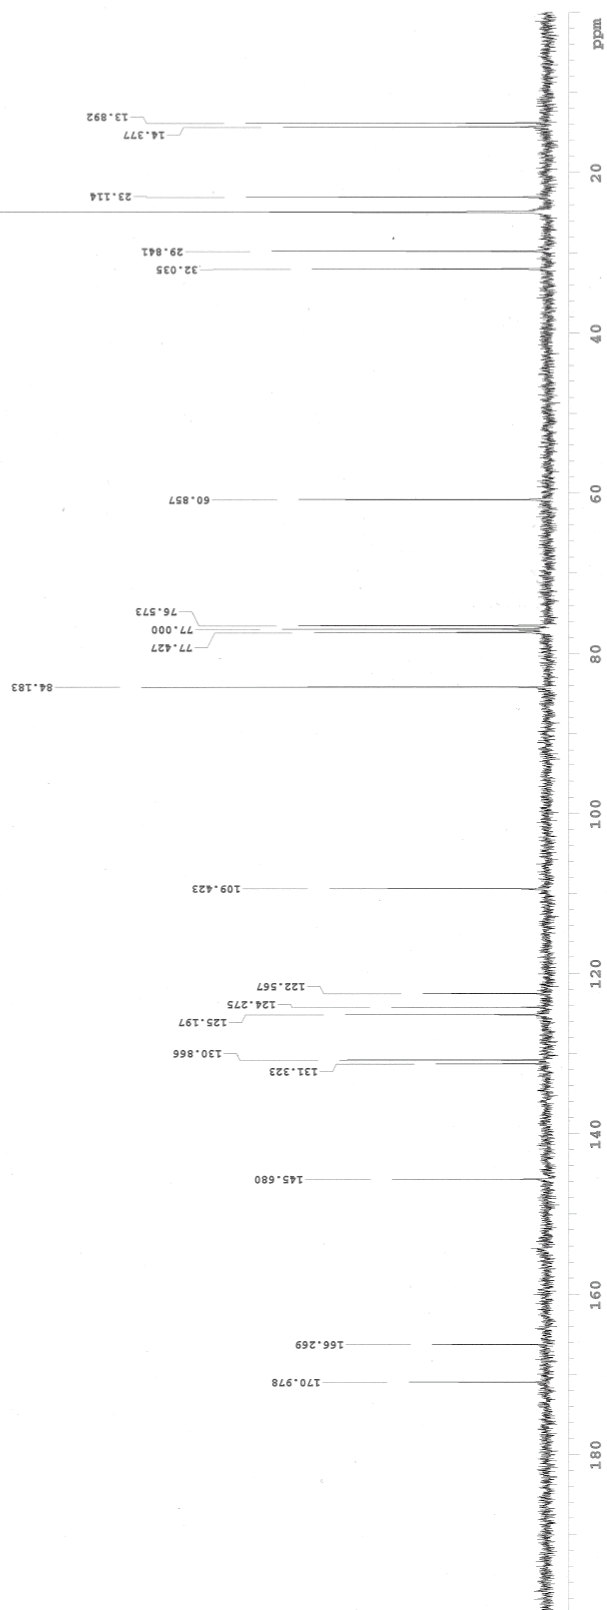

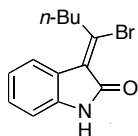

7

STANDARD IN OBSERVE

Pulse Sequence: s2pul

Solvent: CDCl3

Ambient temperature

GEMIN-300DB "varian2"

Relax. delay 1.502 sec

Pulse 45.0 degrees

Acq. time 3.200 sec

Width 5000.0 Hz

16 repetitions

OBSERVE H1, 300.0672369 MHz

DATA PROCESSING

FT size 32768

Total time 1 min, 24 sec

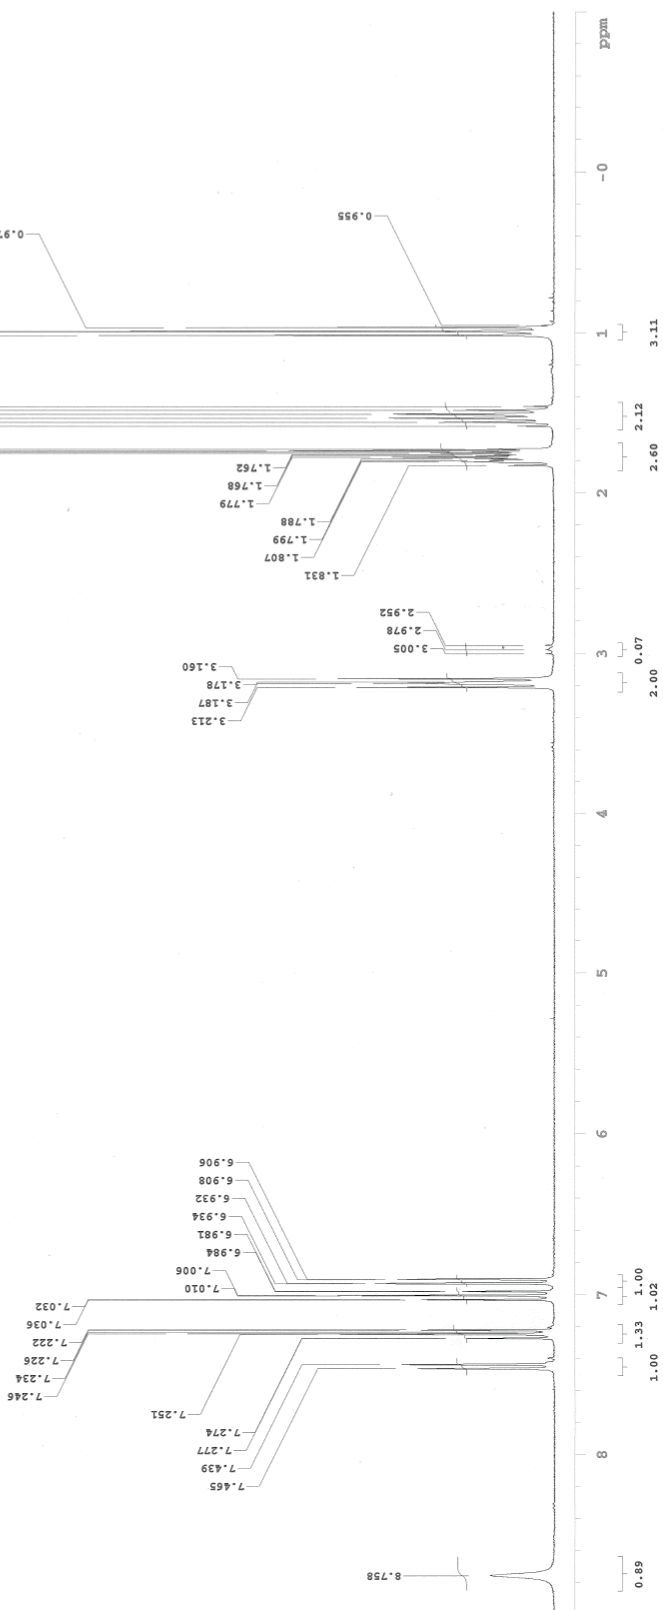

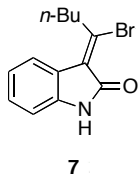

13C OBSERVE

Pulse Sequence: s2pul  
 Solvent: CDCl3  
 Ambient temperature  
 GEMIN-300DB "variant2"  
 Relax. delay 1.158 sec  
 Pulse 45.0 degrees  
 Acq. time 0.842 sec  
 Width 24000.0 Hz  
 472 repetitions  
 OBSERVE C13, 75.4519696 MHz  
 DECOUPLE H1, 300.0687385 MHz  
 Power 37 dB  
 continuously on  
 WALTZ-16 modulated  
 DATA PROCESSING  
 Line broadening 1.0 Hz  
 FT size 65536  
 Total time 7 hr, 27 min, 22 sec

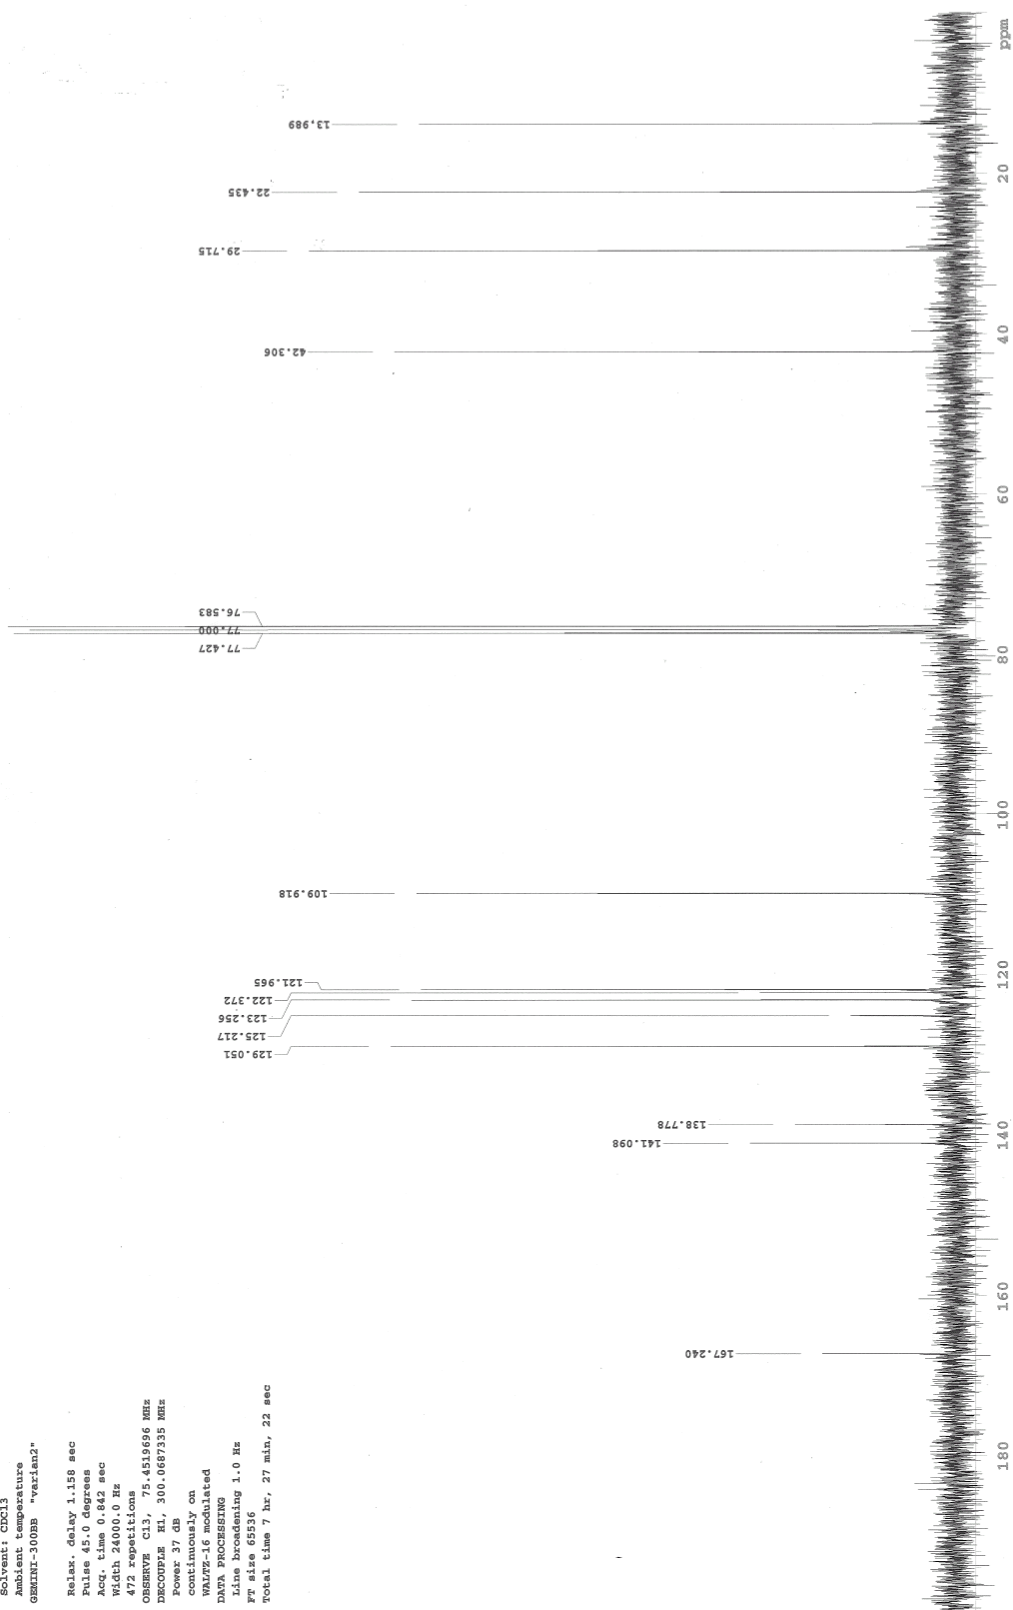

Supplement: Supplementary file 1 [file 4640725]
